# Supplementary material for: A Culture-Independent Approach to Unravel Uncultured Bacteria and Functional Genes in a Complex Microbial Community
Source: PubMed Central journal article supplement (PMC3474725; doi:10.1371/journal.pone.0047530), 2012-10-17
Supplement: pone.0047530.s001.pdf [file pone.0047530.s001.pdf]

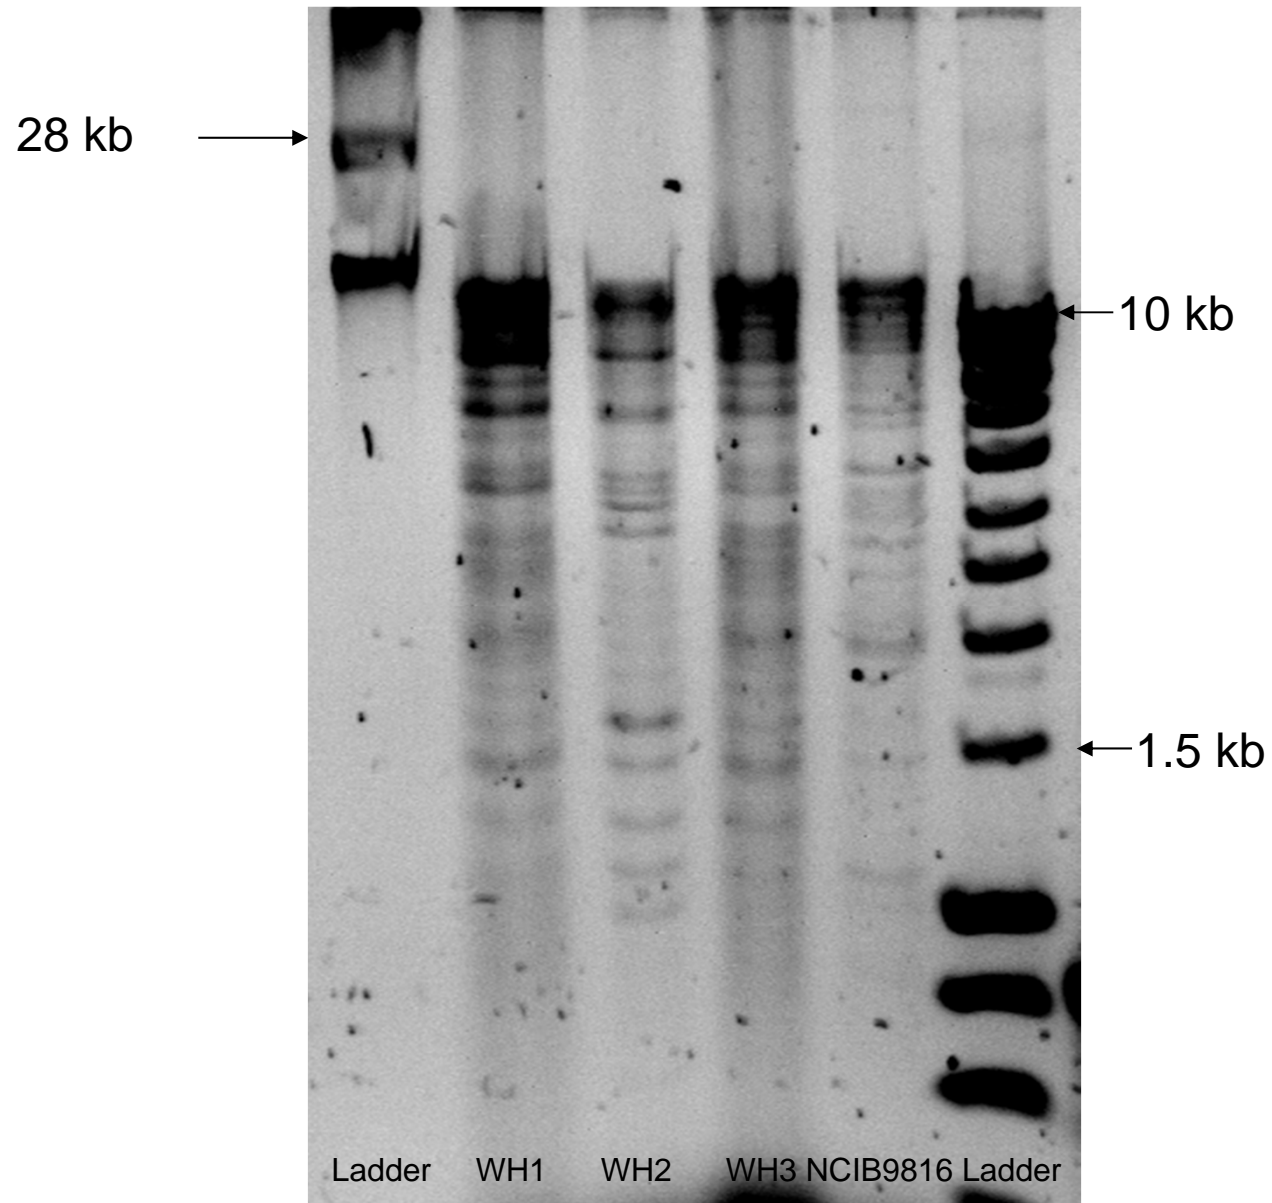

**Figure S1. Restriction enzyme digests of plasmids.** Plasmids were extracted from *P. putida* WH1, *P. fluorescens* WH2, *P. putida* WH3 and *P. putida* NCIB9816 and digested by EcoRI. Samples were run on a 0.8% agarose gel.
