# Supplementary material for: A Culture-Independent Approach to Unravel Uncultured Bacteria and Functional Genes in a Complex Microbial Community
Source: PubMed Central journal article supplement (PMC3474725; doi:10.1371/journal.pone.0047530), 2012-10-17
Supplement: pone.0047530.s002.pdf [file pone.0047530.s002.pdf]

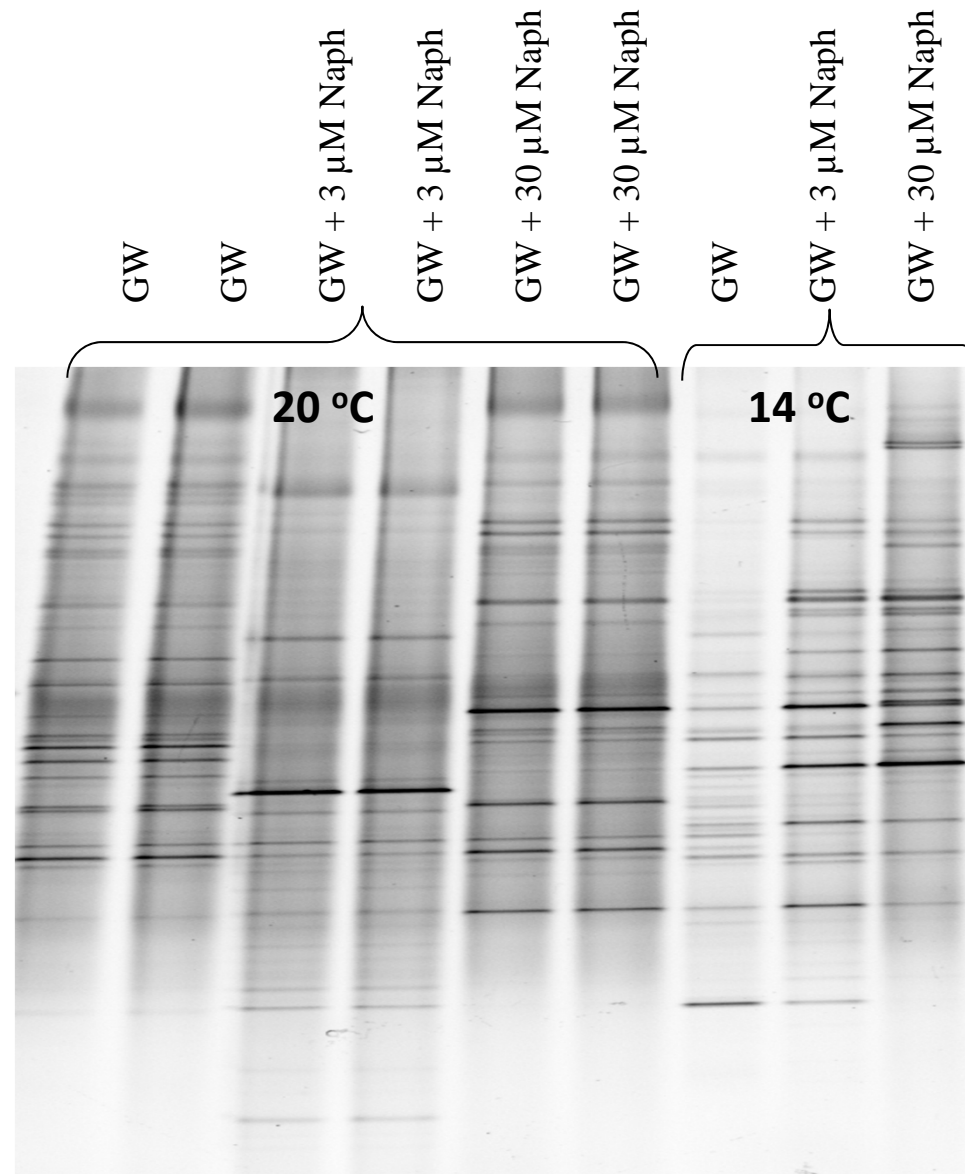

**Figure S2.** The effect of temperature and naphthalene concentration on the structure of the microbial community determined by 16S rRNA DGGE analysis.
