# Supplementary material for: A Culture-Independent Approach to Unravel Uncultured Bacteria and Functional Genes in a Complex Microbial Community
Source: PubMed Central journal article supplement (PMC3474725; doi:10.1371/journal.pone.0047530), 2012-10-17
Supplement: pone.0047530.s004.pdf [file pone.0047530.s004.pdf]

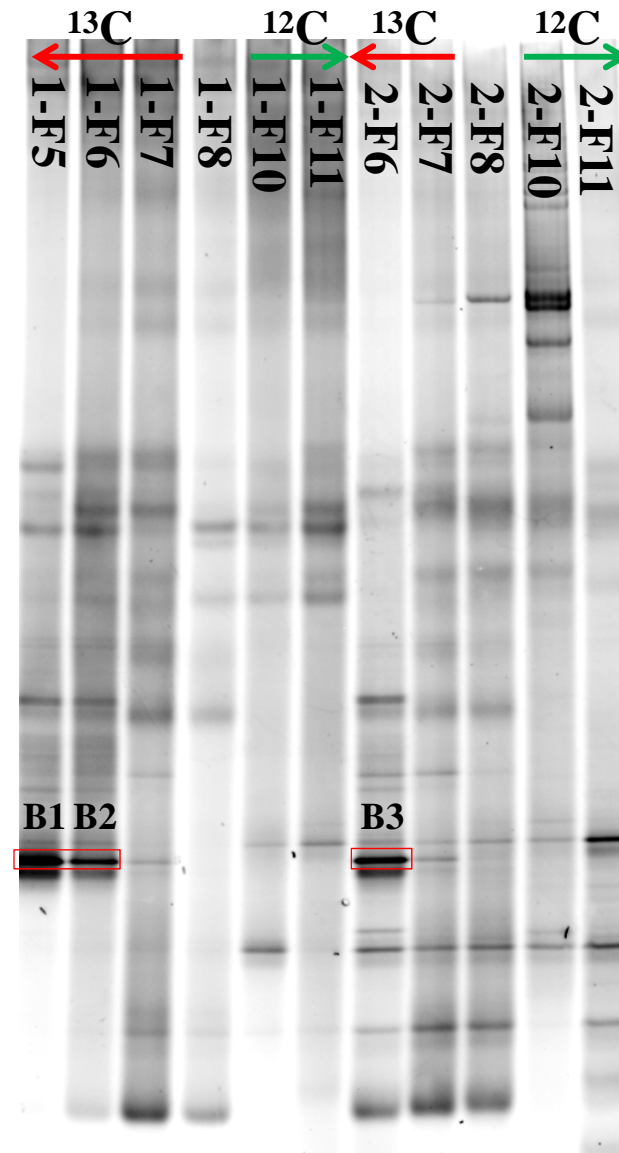

**Figure S4. 16S-rRNA DGGE analysis of the microbial communities in  $^{13}\text{C}$ - and  $^{12}\text{C}$ -enriched DNA.** Two duplicate experiments (1 & 2) were performed. F stands for different fractions after SIP separation. The most intense bands B, present in the  $^{13}\text{C}$ -DNA but not in the  $^{12}\text{C}$ -DNA (labelled B1, B2 and B3), were excised, re-amplified, and sequenced. The result revealed its affiliation with *Acidovorax* sp. and was designated as *Acidovorax* sp. WH.
