# Supplementary material for: A Culture-Independent Approach to Unravel Uncultured Bacteria and Functional Genes in a Complex Microbial Community
Source: PubMed Central journal article supplement (PMC3474725; doi:10.1371/journal.pone.0047530), 2012-10-17
Supplement: pone.0047530.s005.pdf [file pone.0047530.s005.pdf]

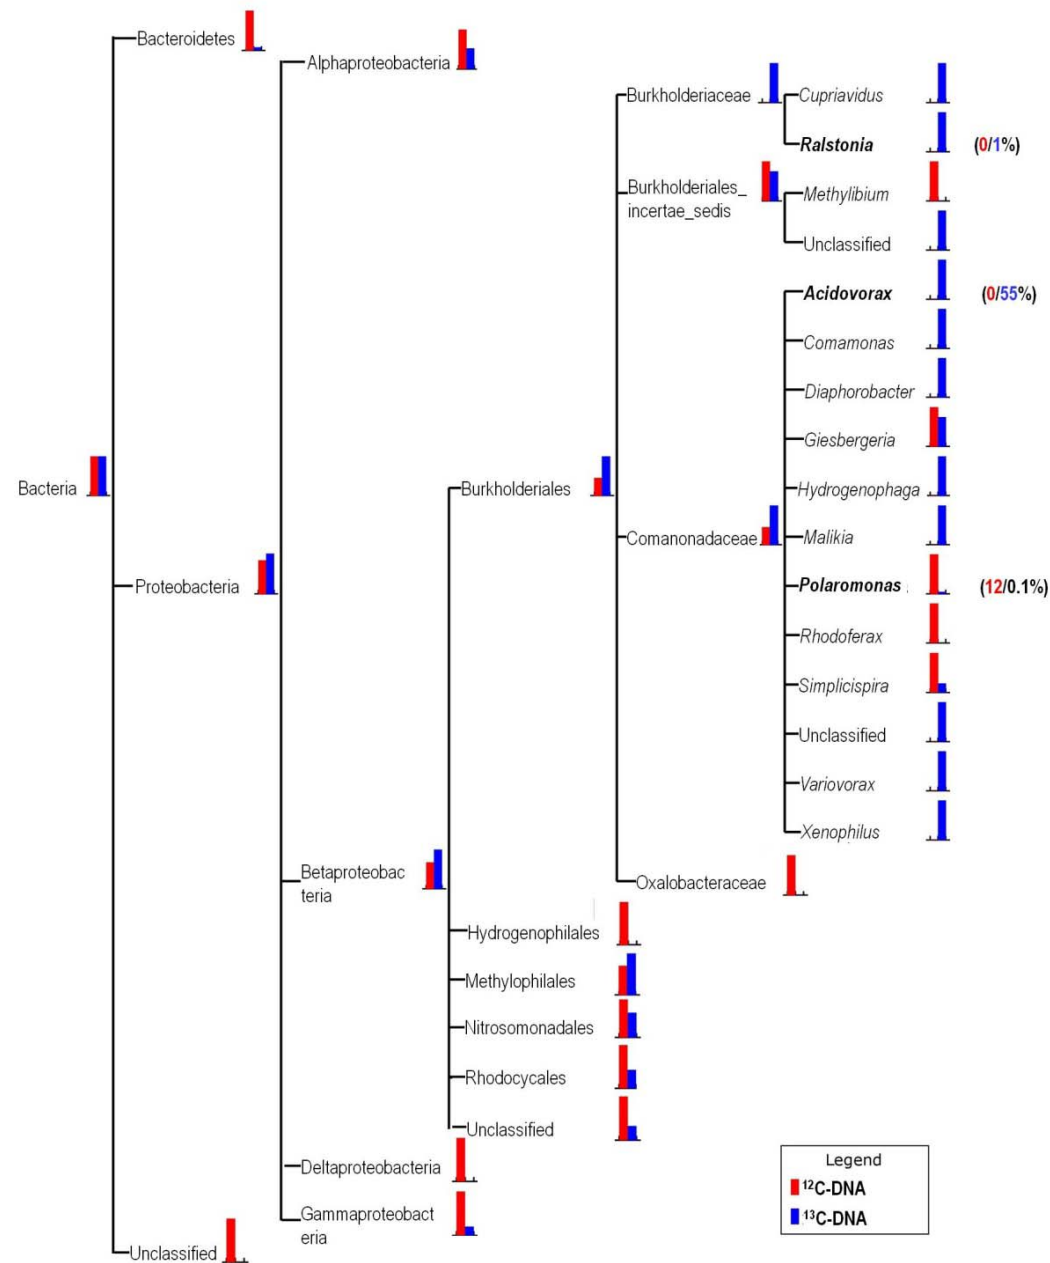

**Figure S5. Phylogenetic tree of some classified 16S rRNA sequences in the <sup>12</sup>C- and <sup>13</sup>C-DNA fractions. Species relative abundance of the total 16S-rRNA reads is shown as %.**
