# Supplementary material for: A Culture-Independent Approach to Unravel Uncultured Bacteria and Functional Genes in a Complex Microbial Community
Source: PubMed Central journal article supplement (PMC3474725; doi:10.1371/journal.pone.0047530), 2012-10-17
Supplement: pone.0047530.s006.pdf [file pone.0047530.s006.pdf]

U2 *nagAc* 319 GGCTCCAACGGGGAACCTCAAAGCGTTCCCTTTGAAAAAGATTGTACGGGATACGATCAAAAAGAAATGCTTGGGCTTGAAAGAAGTCCCCCGCCTC 418  
 CJ2 *nagAc* 319 GGCTCCAACGGGGAACCTCAAAGCGTTCCCTTTGAAAAAGATTGTACGGGATACGATCAAAAAGAAATGCTTGGGCTTGAAAGAAGTCCCCCGCCTC 418  
 GW *nagAc* 319 GGCTCCAACGGGGAACCTCAAAGCGTTCCCTTTGAAAAAGATTGTACGGGATACGATCAAAAAGAAATGCTTGGGCTTGAAAGAAGTCCCCCGCCTC 418  
 U2 *nagAc* 419 GAAAGCTTTTCATGGCTTTCATTTACGGTGTGTTTTGATGCAGAGGCCCCCGCTTGTGATTATCTGGGTGATGCAGCCTGGTACTTGAACCCATCTTCA 518  
 CJ2 *nagAc* 419 GAAAGCTTTTCATGGCTTTCATTTACGGTGTGTTTTGATGCAGAGGCCCCCGCTTGTGATTATCTGGGTGATGCAGCCTGGTACTTGAACCCATCTTCA 518  
 GW *nagAc* 419 GAAAGCTTTTCATGGCTTTCATTTACGGTGTGTTTTGATGCAGAGGCCCCCGCTTGTGATTATCTGGGTGATGCAGCCTGGTACTTGAACCCATCTTCA 518  
 U2 *nagAc* 519 AGCACTCTGGTGGCTCTGGAACCTGTAGGCCCCCCGGCAAAGTGGTGATCAAGGCCAACTGGAAGGCCCTCGGAAAACCTTTGTGGGTGACGCATACCA 618  
 CJ2 *nagAc* 519 AGCACTCAGGCGGTCTGGAACCTGTAGGCCCCCCGGCAAAGTGGTGATCAAGGCCAACTGGAAGGCCCTCGGAAAACCTTTGTGGGTGACGCATACCA 618  
 GW *nagAc* 519 AGCACTCAGGCGGTCTGGAACCTGTAGGCCCCCCGGCAAAGTGGTGATCAAGGCCAACTGGAAGGCCCTCGGAAAACCTTTGTGGGTGACGCATACCA 618  
 U2 *nagAc* 619 CGTGGTGGTGGACGCACGCATCGTCTTTGCGCTCAGGTCAGTCGATATTTACCCCTCTGCGGGCAACGCATGCTTCCACCCGAAGGCGCGGGCTTCAA 718  
 CJ2 *nagAc* 619 CGTGGTGGTGGACGCACGCATCGTCTTTGCGCTCAGGTCAGTCGATATTTACCCCTCTGCGGGCAACGCATGCTTCCACCCGAAGGCGCGGGCTTCAA 718  
 GW *nagAc* 619 CGTGGTGGTGGACGCACGCATCGTCTTTGCGCTCAGGTCAGTCGATATTTACCCCTCTGCGGGCAACGCATGCTTCCACCCGAAGGCGCGGGCTTCAA 718  
 U2 *nagAc* 719 ATGACCAGCAAATAGGCAGTGGAAATGGGGGTATTGTGGGACGGCTATCCGGGTGTCACAGTGGTACCTGGTCCCGAATGATGGCATTCCGGCGGG 818  
 CJ2 *nagAc* 719 ATGACCAGCAAATAGGCAGTGGAAATGGGGGTATTGTGGGACGGCTATCCGGGTGTCACAGTGGTACCTGGTCCCGAATGATGGCATTCCGGCGGG 818  
 GW *nagAc* 719 ATGACCAGCAAATAGGCAGTGGAAATGGGGGTATTGTGGGACGGCTATCCGGGTGTCACAGTGGTACCTGGTCCCGAATGATGGCATTCCGGCGGG 818  
 U2 *nagAc* 819 CAAAACAGGAAAACTCGCCAAAGAAATCGGGGATGTCCGGGCACGGATTTACCGCAGCCATCTAACTGCACGGTTTTTCCCGAACAACAGCATTTTGAC 918  
 CJ2 *nagAc* 819 CAAAACAGGAAAACTCGCCAAAGAAATCGGGGATGTCCGGGCACGGATTTACCGCAGCCATCTAACTGCACGGTTTTTCCCGAACAACAGCATTTTGAC 918  
 GW *nagAc* 819 CAAAACAGGAAAACTCGCCAAAGAAATCGGGGATGTCCGGGCACGGATTTACCGCAGCCATCTAACTGCACGGTTTTTCCCGAACAACAGCATTTTGAC 918  
 U2 *nagAc* 919 CTGCTCCGGTGTCTTCAAGGTCTGGAACCCGATCGATGAAACACGACCGAGTTTGGACGTATGCCATCGTGA AAAAAGACATGCCGAGGAACTTAAAG 1018  
 CJ2 *nagAc* 919 CTGCTCCGGTGTCTTCAAGGTCTGGAACCCGATCGATGAAACACGACCGAGTTTGGACGTATGCCATCGTGA AAAAAGACATGCCGAGGAACTTAAAG 1018  
 GW *nagAc* 919 CTGCTCCGGTGTCTTCAAGGTCTGGAACCCGATCGATGAAACACGACCGAGTTTGGACGTATGCCATCGTGA AAAAAGACATGCCGAGGAACTTAAAG 1018  
 U2 *nagAc*1019 CGTTCGCTTGCTGACGCGGTTTCAGCGCACCTTCGGACCGCAGGATTCTGGGAAAGCGACGACAACGACAACATGGAGACGGAGTCGCAAAATGCCAAGA 1118  
 CJ2 *nagAc*1019 ATCCGCTTAGCCGACGCGGTTTCAGCGCACCTTCGGACCGCAGGATTCTGGGAAAGCGACGACAACGACAACATGGAGACGGAGTCGCAAAATGCCAAGA 1118  
 GW *nagAc*1019 ATCCGCTTAGCCGACGCGGTTTCAGCGCACCTTCGGACCGCAGGATTCTGGGAAAGCGACGACAACGACAACATGGAGACGGAGTCGCAAAATGCCAAGA 1118  
 U2 *nagAc*1119 AATACCAATCCAGCAACAGGATCTGATTGCCAAATTTGGGTTTCGGCAAGGACGTCTACGGGAGGAAATGATCCGGGCGTCTGTCCAAATCGGCAT 1218  
 CJ2 *nagAc*1119 AATACCAATCCAGCAACAGGATCTGATTGCCAAATTTGGGTTTCGGCAAGGACGTCTACGGGAGGAAATGATCCGGGCGTCTGTCCAAATCGGCAT 1218  
 GW *nagAc*1119 AATACCAATCCAGCAACAGGATCTGATTGCCAAATTTGGGTTTCGGCAAGGACGTCTACGGGAGGAAATGATCCGGGCGTCTGTCCAAATCGGCAT 1218  
 U2 *nagAc*1219 CGGGAAACCAGCTATCGCGGATTCTACCGTGCCTACCAAGCCACATCAGCAGCTCCAATTGGGCCGAGTTCGAAAACAGCTCCCGAATTTGGCAGACC 1318  
 CJ2 *nagAc*1219 CGGGAAACCAGCTATCGCGGATTCTACCGTGCCTACCAAGCCACATCAGCAGCTCCAATTGGGCCGAGTTCGAAAACAGCTCCCGAATTTGGCAGACC 1318  
 GW *nagAc*1219 CGGGAAACCAGCTATCGCGGATTCTACCGTGCCTACCAAGCCACATCAGCAGCTCCAATTGGGCCGAGTTCGAAAACAGCTCCCGAATTTGGCAGACC 1318  
 U2 *nagAc*1319 GAACTCACCAAGACCACTGATCGCTAA 1345  
 CJ2 *nagAc*1319 GAACTCACCAAGACCACTGATCGCTAA 1345  
 GW *nagAc*1319 GAACTCACCAAGACCACTGATCGCTAA 1345

— GYVI30E01AX3SN  
 - · - · GYVI30E01ERXW9  
 = = = GYVI30E02FYFOH

|     |              |     |                                                                                                            |                                                           |     |
|-----|--------------|-----|------------------------------------------------------------------------------------------------------------|-----------------------------------------------------------|-----|
| U2  | <i>nagAd</i> | 1   | ATGATGATCAATACCCAGGAAGACAAGCTGGTCTCCGCGCACGACGC                                                            | GAAGAATTTTCATCGTTTCTTCCTCGGACACGATAGCGATTGCAAGAAAG        | 100 |
| CJ2 | <i>nagAd</i> | 1   | ATGATGATCAATACCCAGGAAGACAAGCTGGTCTCCGCGCACGACGC                                                            | GAAGAATTTTCATCGTTTCTTCCTCGGACACGATAGCGATTGCAAGAAAG        | 100 |
| GW  | <i>nagAd</i> | 1   | <u>ATGATGATCAATACCCAGGAAGACAAGCTGGTCTCCGCGCACGACGC</u>                                                     | <u>GAAGAATTTTCATCGTTTCTTCCTCGGACACGATAGCGATTGCAAGAAAG</u> | 100 |
| U2  | <i>nagAd</i> | 101 | TCATCACACTCCTGACCCGAGAAGCACATCTGTTGGACATTCAGGCATACAAGCCTGGCTTGAACACTGCGTTGCCCCCGAGATCAAATACCAAGTGAT        | 200                                                       |     |
| CJ2 | <i>nagAd</i> | 101 | TCATCACACTCCTGACCCGAGAAGCACATCTGTTGGACATTCAGGCATACAAGCCTGGCTTGAACACTGCGTTGCCCCCGAGATCAAATACCAAGTGAT        | 200                                                       |     |
| GW  | <i>nagAd</i> | 101 | <u>TCATCACACTCCTGACCCGAGAAGCACATCTGTTGGACATTCAGGCATACAAGCCTGGCTTGAACACTGCGTTGCCCCCGAGATCAAATACCAAGTGAT</u> | 200                                                       |     |
| U2  | <i>nagAd</i> | 201 | CTCGGAGAAATTCGTTCCACTTCGAGCGTCGATACAAGCTGAATGATGCGGTGAACATCTACAACGAGAACTATCAGCAACTGAAAGTTCGAGTTGAG         | 300                                                       |     |
| CJ2 | <i>nagAd</i> | 201 | CTCGGAGAAATTCGTTCCACTTCGAGCGTCGATACAAGCTGAATGATGCGGTGAACATCTACAACGAGAACTATCAGCAACTGAAAGTTCGAGTTGAG         | 300                                                       |     |
| GW  | <i>nagAd</i> | 201 | <u>CTCGGAGAAATTCGTTCCACTTCGAGCGTCGATACAAGCTGAATGATGCGGTGAACATCTACAACGAGAACTATCAGCAACTGAAAGTTCGAGTTGAG</u>  | 300                                                       |     |
| U2  | <i>nagAd</i> | 301 | CATCAGATGACCCGCAGAAATGGGCCAACAGCCCGAAGATCGTTTTCACCCGTTTCGTCACCAATGTCAAGCCGCAAGGACAGATCGTACC GGATC          | 400                                                       |     |
| CJ2 | <i>nagAd</i> | 301 | CATCAGATGACCCGCAGAAATGGGCCAACAGCCCGAAGATCGTTTTCACCCGTTTCGTCACCAATGTCAAGCCGCAAGGACAGATCGTACC GGATC          | 400                                                       |     |
| GW  | <i>nagAd</i> | 301 | <u>CATCAGATGACCCGCAGAAATGGGCCAACAGCCCGAAGATCGTTTTCACCCGTTTCGTCACCAATGTCAAGCCGCAAGGACAGATCGTACC GGATC</u>   | 400                                                       |     |
| U2  | <i>nagAd</i> | 401 | TGCTGCATGTCCGTTCCAACCTCATTCTCCAC                                                                           | 432                                                       |     |
| CJ2 | <i>nagAd</i> | 401 | TGCTGCATGTCCGTTCCAACCTCATTCTCCAC                                                                           | 432                                                       |     |
| GW  | <i>nagAd</i> | 401 | <u>TGCTGCATGTCCGTTCCAACCTCATTCTCCAC</u>                                                                    | 432                                                       |     |

———— GYVI30E01DH2TJ

|     |             |     |                                                                                                       |     |
|-----|-------------|-----|-------------------------------------------------------------------------------------------------------|-----|
| U2  | <i>nagB</i> | 476 | TTTCTTCCTATGCGGTCGGTGGCGGCGGTTCTTGCTACATGGCCAGCAAACATGCAGTGCTGGGATATGGTCAAGGCATTGGCCTACGAATTGGCTCCGCA | 575 |
| CJ2 | <i>nagB</i> | 476 | TTTCTTCCTATGCGGTCGGTGGCGGCGGTTCTTGCTACATGGCCAGCAAACATGCAGTGCTGGGATATGGTCAAGGCATTGGCCTACGAATTGGCTCCGCA | 575 |
| GW  | <i>nagB</i> | 476 | TTTCTTCCTATGCGGTCGGTGGCGGCGGTTCTTGCTACATGGCCAGCAAACATGCAGTGCTGGGATATGGTCAAGGCATTGGCCTACGAATTGGCTCCGCA | 575 |
| U2  | <i>nagB</i> | 576 | CATCCGGGTCAATGGCGTTGCGCCAGGTGGTACGGTCACTTCTTTGGCTGGGCCGGCAAGCGCTGGTTTCGACAAAACAAAATGAAAGACATGCCCGGC   | 675 |
| CJ2 | <i>nagB</i> | 576 | CATCCGGGTCAATGGCGTTGCGCCAGGTGGTACGGTCACTTCTTTGGCTGGGCCGGCAAGCGCTGGTTTCGACAAAACAAAATGAAAGACATGCCCGGC   | 675 |
| GW  | <i>nagB</i> | 576 | CATCCGGGTCAATGGCGTTGCGCCAGGTGGTACGGTCACTTCTTTGGCTGGGCCGGCAAGCGCTGGTTTCGACAAAACAAAATGAAAGACATGCCCGGC   | 675 |
| U2  | <i>nagB</i> | 676 | ATCGATGACATGATCAAAGGCCTGACTCCCTTGGGGTTCGCGCAAGGCCCGAGGACGTGGTGGCACCGTACTTTTTGCTGGCCTCCCGGGAACAAGGGA   | 775 |
| CJ2 | <i>nagB</i> | 676 | ATCGATGACATGATCAAAGGCCTGACTCCCTTGGGGTTCGCGCAAGGCCCGAGGACGTGGTGGCACCGTACTTTTTGCTGGCCTCCCGGGAACAAGGGA   | 775 |
| GW  | <i>nagB</i> | 676 | ATCGATGACATGATCAAAGGCCTGACTCCCTTGGGGTTCGCGCAAGGCCCGAGGACGTGGTGGCACCGTACTTTTTGCTGGCCTCCCGGGAACAAGGGA   | 775 |
| U2  | <i>nagB</i> | 776 | AGTTCATCACTGGCACCGTATCAGCATTGATGGCGGCATGGCGCTCGGTCGAAAGTGA                                            | 834 |
| CJ2 | <i>nagB</i> | 776 | AGTTCATCACTGGCACCGTATCAGCATTGATGGCGGCATGGCGCTCGGTCGAAAGTGA                                            | 834 |
| GW  | <i>nagB</i> | 776 | AGTTCATCACTGGCACCGTATCAGCATTGATGGCGGCATGGCGCTCGGTCGAAAGTGA                                            | 834 |

———— GYVI30E01D06VU



U2 *nagF* 1 ATGAAGACGAAATTGTTTATCAACACACCTGGAGCGCTTCGAGTGACAAAAAGTCAATTGATCGGAAGCACCCTGTCAGTGGCGAGGTCCTGACCCAAT 100  
 CJ2 *nagF* 1 ATGAAGACGAAATTGTTTATCAACACACCTGGAGCGATTCAAGTGACAAAAAATCACTTGATCGGAAGCACCCTGTCAGTGGCGAGACCTGACCCAAT 100  
 GW *nagF* 1 ATGAAGACGAAATTGTTTATCAACACACCTGGAGCGCTTCGAGTGACAAAAAGTCAATTGATCGGAAGCACCCTGTCAGTGGCGAGGTCCTGACCCAAT 100  
  
 U2 *nagF* 101 GCGCGAAGGCACCGGTGGACGATGCGGGCAAGGCGGCTCAAGAGGCGTTCAGTTCCTGGAAGGCCGTGGACCCTCGGAGCGGGGGCGCCT 200  
 CJ2 *nagF* 101 GCGCGAAGGCACCGGTGGACGATGCGGGCAAGGCGGCTCAAGAGGCGTTCAGTTCCTGGAAGGCCGTGGACCCTCGGAGCGGGGGCGCCT 200  
 GW *nagF* 101 GCGCGAAGGCACCGGTGGACGATGCGGGCAAGGCGGCTCAAGAGGCGTTCAGTTCCTGGAAGGCCGTGGACCCTCGGAGCGGGGGCGCCT 200  
  
 U2 *nagF* 201 TCTTTTGAAGGTGGCAGAGTTCATGGAGAGCAAACGCCCGAGTTCATCAAGTGATGGCCAAGGAAGTGGGGCCCTCCGCGCTTGGGCGGGGTTC AAC 300  
 CJ2 *nagF* 201 TCTTTTGAAGGTGGCAGAGTTCATGGAGAGCAAACGCCCGAGTTCATCAAGTGATGGCCAAGGAAGTGGGGCCCTCCGCGCTTGGGCGGGGTTC AAC 300  
 GW *nagF* 201 TCTTTTGAAGGTGGCAGAGTTCATGGAGAGCAAACGCCCGAGTTCATCAAGTGATGGCCAAGGAAGTGGGGCCCTCCGCGCTTGGGCGGGGTTC AAC 300  
  
 U2 *nagF* 301 GTGCACCTGTCGGCCAATGTATTCCGGGAAGCCGCCTCACTGGCCACCAAATCAAGGTGAAACCATTCCGACGGACAAGCTGACACCCTGTCATGA 400  
 CJ2 *nagF* 301 GTGCACCTGTCGGCCAATGTATTCCGGGAAGCCGCCTCACTGGCCACCAAATCAAGGTGAAACCATTCCGACGGACAAGCTGACACCCTGTCATGA 400  
 GW *nagF* 301 GTGCACCTGTCGGCCAATGTATTCCGGGAAGCCGCCTCACTGGCCACCAAATCAAGGTGAAACCATTCCGACGGACAAGCTGACACCCTGTCATGA 400  
  
 U2 *nagF* 401 CGCTGCGTCAACCGTGTCCGGCCCCATCTTGAGTATCGTTCCCTGGAACGGCACCGCCGTTGCTCGCGGCGCGGGCCATCGCTTATCCGTGGTCTGCGGCAA 500  
 CJ2 *nagF* 401 CGCTGCGTCAACCGTGTCCGGCCCCATCTTGAGTATCGTTCCCTGGAACGGCACCGCCGTTGCTCGCGGCGCGGGCCATCGCTTATCCGTGGTCTGCGGCAA 500  
 GW *nagF* 401 CGCTGCGTCAACCGTGTCCGGCCCCATCTTGAGTATCGTTCCCTGGAACGGCACCGCCGTTGCTCGCGGCGCGGGCCATCGCTTATCCGTGGTCTGCGGCAA 500  
  
 U2 *nagF* 501 TACCGTGTGTTCAAAGGCTCCGAGTTCAGCCCCGGACGCACGCGTTGATCGCGAAGTGCCTACAGGAGGCCGCTGCCCTGCTGGCGTGTCAAATAT 600  
 CJ2 *nagF* 501 TACCGTGTGTTCAAAGGCTCCGAGTTCAGCCCCGGACGCACGCGTTGATCGCGAAGTGCCTACAGGAGGCCGCTGCCCTGCTGGCGTGTCAAATAT 600  
 GW *nagF* 501 TACCGTGTGTTCAAAGGCTCCGAGTTCAGCCCCGGACGCACGCGTTGATCGCGAAGTGCCTACAGGAGGCCGCTGCCCTGCTGGCGTGTCAAATAT 600  
  
 U2 *nagF* 601 TCTGAACTCTCCCCGGACCGTCGCCCGATATGCGGATGCGCTGATTTTCGTCTAAAGAGATTTCGTCGCATCAACTTACAGGGCTCCACTCGCGTGGGGC 700  
 CJ2 *nagF* 601 TCTGAACTCTCCCCGGACCGTCGCCCGATATGCGGATGCGCTGATTTTCGTCTAAAGAGATTTCGTCGCATCAACTTACAGGGCTCCACTCGCGTGGGGC 700  
 GW *nagF* 601 TCTGAACTCTCCCCGGACCGTCGCCCGATATGCGGATGCGCTGATTTTCGTCTAAAGAGATTTCGTCGCATCAACTTACAGGGCTCCACTCGCGTGGGGC 700  
  
 U2 *nagF* 701 GCATCATCGCCCAGAAAACCGGCCAACATCTCAAGCGCTGCTTGCTGGAGTTGGGTGGCAAGTCCCCGCTGATCGTTCTGGACGACGCGGACATCGACGC 800  
 CJ2 *nagF* 701 GCATCATCGCCCAGAAAACCGGCCAACATCTCAAGCGCTGCTTGCTGGAGTTGGGTGGCAAGTCCCCGCTGATCGTTCTGGACGACGCGGACATCGACGC 800  
 GW *nagF* 701 GCATCATCGCCCAGAAAACCGGCCAACATCTCAAGCGCTGCTTGCTGGAGTTGGGTGGCAAGTCCCCGCTGATCGTTCTGGACGACGCGGACATCGACGC 800  
  
 U2 *nagF* 801 GCGGCGTCAAGGCACGGGTGTTGGCAGTTTCCCTGTTCCAAGGCCAGATCTGCATGTCCACCGAACGCCTGGTGGTGCACGAAAGATCGCGGACGAATTT 900  
 CJ2 *nagF* 801 GCGGCGTCAAGGCACGGGTGTTGGCAGTTTCCCTGTTCCAAGGCCAGATCTGCATGTCCACCGAACGCCTGGTGGTGCACGAAAGATCGCGGACGAATTT 900  
 GW *nagF* 801 GCGGCGTCAAGGCACGGGTGTTGGCAGTTTCCCTGTTCCAAGGCCAGATCTGCATGTCCACCGAACGCCTGGTGGTGCACGAAAGATCGCGGACGAATTT 900  
  
 U2 *nagF* 901 GTCGCGAAGTTCGTCGAGAAAACCAAGAGTTGAGTGCAGGCGATCCATGCGTACAGGGGACTGCAATCATGGCCCGATGGTGTGCGCCAACCTCGGGT 1000  
 CJ2 *nagF* 901 GTCGCGAAGTTCGTCGAGAAAACCAAGAGTTGAGTGCAGGCGATCCATGCGTACAGGGGACTGCAATCATGGCCCGATGGTGTGCGCCAACCTCGGGT 1000  
 GW *nagF* 901 GTCGCGAAGTTCGTCGAGAAAACCAAGAGTTGAGTGCAGGCGATCCATGCGTACAGGGGACTGCAATCATGGCCCGATGGTGTGCGCCAACCTCGGGT 1000  
  
 U2 *nagF* 1001 ACCGATCAATGGCTGTGTTCAAAGATGCCATCAGCAAGGGTGCCAAGGTTCGTGTGCGGGGGATGGCCGAGGGTGCGGTTCATGCCCGCCACGATCTGGA 1100  
 CJ2 *nagF* 1001 ACCGATCAATGGCTGTGTTCAAAGATGCCATCAGCAAGGGTGCCAAGGTTCGTGTGCGGGGGATGGCCGAGGGTGCGGTTCATGCCCGCCACGATCTGGA 1100  
 GW *nagF* 1001 ACCGATCAATGGCTGTGTTCAAAGATGCCATCAGCAAGGGTGCCAAGGTTCGTGTGCGGGGGATGGCCGAGGGTGCGGTTCATGCCCGCCACGATCTGGA 1100  
  
 U2 *nagF* 1101 CCACGTGACAGCCGACATGCAGATCTACGATGAGGAAACCTTCGGTCCCATCACCTGTGGTTATCCGGTGAAGAGCGAAGCGGACGCCATCCGATTGCC 1200  
 CJ2 *nagF* 1101 CCACGTGACAGCCGACATGCAGATCTACGATGAGGAAACCTTCGGTCCCATCACCTGTGGTTATCCGGTGAAGAGCGAAGCGGACGCCATCCGATTGCC 1200  
 GW *nagF* 1101 CCACGTGACAGCCGACATGCAGATCTACGATGAGGAAACCTTCGGTCCCATCACCTGTGGTTATCCGGTGAAGAGCGAAGCGGACGCCATCCGATTGCC 1200  
  
 U2 *nagF* 1201 AATGACAGCGCTATCGGCCTGTCATCGGGCGTGTGTTGGCCGGGACGTCAACCGGGCTGTCGCGTGGGATGGCGATCGAATACGGCTCGGTCCATATCA 1300  
 CJ2 *nagF* 1201 AATGACAGCGCTATCGGCCTGTCATCGGGCGTGTGTTGGCCGGGACGTCAACCGGGCTGTCGCGTGGGATGGCGATCGAATACGGCTCGGTCCATATCA 1300  
 GW *nagF* 1201 AATGACAGCGCTATCGGCCTGTCATCGGGCGTGTGTTGGCCGGGACGTCAACCGGGCTGTCGCGTGGGATGGCGATCGAATACGGCTCGGTCCATATCA 1300  
  
 U2 *nagF* 1301 ACGGCTCACCGTTCAGAACGAGGCTCAGGCGCCTTATGGCGGACAAAGGCCACCGGTTATGGCGCTTCGACGGACGCGCGGTGATGACGAGTTCAC 1400  
 CJ2 *nagF* 1301 ACGGCTCACCGTTCAGAACGAGGCTCAGGCGCCTTATGGCGGACAAAGGCCACCGGTTATGGCGCTTCGACGGACGCGCGGTGATGACGAGTTCAC 1400  
 GW *nagF* 1301 ACGGCTCACCGTTCAGAACGAGGCTCAGGCGCCTTATGGCGGACAAAGGCCACCGGTTATGGCGCTTCGACGGACGCGCGGTGATGACGAGTTCAC 1400  
  
 U2 *nagF* 1401 GGAACTCAAAGTGGCTGACCATTGAACCTTCGAGCAGCAGTATCCCTTCTAA 1452  
 CJ2 *nagF* 1401 GGAACTCAAATGGCTGACCATTGAACCTTCGAGCAGCAGTATCCCTTCTAA 1452  
 GW *nagF* 1401 GGAACTCAAATGGCTGACCATTGAACCTTCGAGCAGCAGTATCCCTTCTAA 1452

————— GYVI30E01CMX3C  
 - · - · - GYVI30E01ALPVF

U2 *nagC* 1 ATGATCAAGCGGCAACAGTGTATTGAATTTGGGTACATGGGCATTTTCGGTCAAGGATCCCGCAGCGTGGAAATCCTTTGCCGCAACATGCTGGGACTTC. 100  
 CJ2 *nagC* 1 ATGATCAAGCGGCAACAGTGTATTGAATTTGGGTACATGGGCATTTTCGGTCAAGGATCCCGCAGCGTGGAAATCCTTTGCCGCAACATGCTGGGACTTC. 100  
 GW *nagC* 1 ATGATCAAGCGGCAACAGTGTATTGAATTTGGGTACATGGGCATTTTCGGTCAAGGATCCCGCAGCGTGGAAATCCTTTGCCGCAACATGCTGGGACTTC. 100  
  
 U2 *nagC* 101 AAGTCCTCGATGAGGGTGACAAGGATCGCTTCTATCTGCGAATGGACAATTGGCACCAATCGGATCGTGGTTCATCACAAGGGTCAAGATGACCTTGAATA 200  
 CJ2 *nagC* 101 AAGTCCTCGATGAGGGTGACAAGGATCGCTTCTATCTGCGAATGGACAATTGGCACCAATCGGATCGTGGTTCATCACAAGGGTCAAGATGACCTTGAATA 200  
 GW *nagC* 101 AAGTCCTCGATGAGGGTGACAAGGATCGCTTCTATCTGCGAATGGACAATTGGCACCAATCGGATCGTGGTTCATCACAAGGGTCAAGATGACCTTGAATA 200  
  
 U2 *nagC* 201 CTTGGGCTGGCGTGTTCGCGGGTCAACCGGAATTCGATGCATTGGGTCAAAAGCTCTGGACGCAGGCTACAAAGTCCCGTGTGCGACAAGCCGAAGCA 300  
 CJ2 *nagC* 201 CTTGGGCTGGCGTGTTCGCGGGTCAACCGGAATTCGATGCATTGGGTCAAAAGCTCTGGACGCAGGCTACAAAGTCCCGTGTGCGACAAGCCGAAGCA 300  
 GW *nagC* 201 CTTGGGCTGGCGTGTTCGCGGGTCAACCGGAATTCGATGCATTGGGTCAAAAGCTCTGGACGCAGGCTACAAAGTCCCGTGTGCGACAAGCCGAAGCA 300  
  
 U2 *nagC* 301 CAAAGAACCGATGGTGTCTGGGCCTGATGAAGACGAAGATCCGGGTGGCAACCCGACCGAGATTTTCTGGGGACCCTGGATGACCTGAACAACCCCTTCC 400  
 CJ2 *nagC* 301 CAAAGAACCGATGGTGTCTGGGCCTGATGAAGACGAAGATCCGGGTGGCAACCCGACCGAGATTTTCTGGGGACCCTGGATGACCTGAACAACCCCTTCC 400  
 GW *nagC* 301 CAAAGAACCGATGGTGTCTGGGCCTGATGAAGACGAAGATCCGGGTGGCAACCCGACCGAGATTTTCTGGGGACCCTGGATGACCTGAACAACCCCTTCC 400  
  
 U2 *nagC* 401 ATCCCGGTCTCCCTTGCACGGGAAATTTCTAACGGGTGATCAGGGCCTGGGCCACTGCATCGTGCCTCAGAACGATGTGAAGCGGCACGTAAGTTCTA 500  
 CJ2 *nagC* 401 ATCCCGGTCTCCCTTGCACGGGAAATTTCTAACGGGTGATCAGGGCCTGGGCCACTGCATCGTGCCTCAGAACGATGTGAAGCGGCACGTAAGTTCTA 500  
 GW *nagC* 401 ATCCCGGTCTCCCTTGCACGGGAAATTTCTAACGGGTGATCAGGGCCTGGGCCACTGCATCGTGCCTCAGAACGATGTGAAGCGGCACGTAAGTTCTA 500  
  
 U2 *nagC* 501 TAGCTTGCTGGGATTTTCGTGGAGATGTCGAGTACCGCCTTCCCTTGCCCAACGGCATGACGGCTGAGTTGACCTTCATGCATTGCAATGCTCGCGATCA 600  
 CJ2 *nagC* 501 TAGCTTGCTGGGATTTTCGTGGAGATGTCGAGTACCGCCTTCCCTTGCCCAACGGCATGACGGCTGAGTTGACCTTCATGCATTGCAATGCTCGCGATCA 600  
 GW *nagC* 501 TAGCTTGCTGGGATTTTCGTGGAGATGTCGAGTACCGCCTTCCCTTGCCCAACGGCATGACGGCTGAGTTGACCTTCATGCATTGCAATGCTCGCGATCA 600  
  
 U2 *nagC* 601 TCCATCGCTTTCGGTTCGAATGCCTGCGGCCAAGCGCCTCAATCATCTGATGATTGAATACACCCATCTGGAAGATTTGGGTTTACACACCAGCTTTTCA 700  
 CJ2 *nagC* 601 TCCATCGCTTTCGGTTCGAATGCCTGCGGCCAAGCGCCTCAATCATCTGATGATTGAATACACCCATCTGGAAGATTTGGGTTTACACACCAGCTTTTCA 700  
 GW *nagC* 601 TCCATCGCTTTCGGTTCGAATGCCTGCGGCCAAGCGCCTCAATCATCTGATGATTGAATACACCCATCTGGAAGATTTGGGTTTACACACCAGCTTTTCA 700  
  
 U2 *nagC* 701 CGAAGGAAAGATTGACATGCTTTGCAATTTGGGATTCATGCCAACGAAAGGGCGCTGACGTTCTAGGGGCAACACCTTCCGGCTGGCTGATCGAACC 800  
 CJ2 *nagC* 701 CGAAGGAAAGATTGACATGCTTTGCAATTTGGGATTCATGCCAACGAAAGGGCGCTGACGTTCTAGGGGCAACACCTTCCGGCTGGCTGATCGAACC 800  
 GW *nagC* 701 CGAAGGAAAGATTGACATGCTTTGCAATTTGGGATTCATGCCAACGAAAGGGCGCTGACGTTCTAGGGGCAACACCTTCCGGCTGGCTGATCGAACC 800  
  
 U2 *nagC* 801 TGGGTGGCGAGGGCCCTCCCGCCATTTGCTGAATCGGAATATTACGTGCGGCGACATTTTCGGCCATCCATCGAGGCCACCGGTTATGGATTGGACGTCAA 900  
 CJ2 *nagC* 801 TGGGTGGCGAGGGCCCTCCCGCCATTTGCTGAATCGGAATATTACGTGCGGCGACATTTTCGGCCATCCATCGAGGCCACCGGTTATGGATTGGACGTCAA 900  
 GW *nagC* 801 TGGGTGGCGAGGGCCCTCCCGCCATTTGCTGAATCGGAATATTACGTGCGGCGACATTTTCGGCCATCCATCGAGGCCACCGGTTATGGATTGGACGTCAA 900  
  
 U2 *nagC* 901 CTGAGCTAG 909  
 CJ2 *nagC* 901 CTGAGCTAA 909  
 GW *nagC* 901 CTGAGCTAA 909

————— GYVI30E01B3SLS  
 - - - - - GYVI30E01CD7IX



U2 *nagQ* 1 ATGATCAAAAAGCCATTTCCCTCGCAGGACTTGGGATGCTGATGCTCAGCACCGCATATGCCGAGGATTCCCCTGGTCTATCGCATCGGGGCCACCA 100  
 CJ2 *nagQ* 1 ATGATCAAAAAGCCATTTCCCTCGCAGGACTTGGGATGCTGATGCTCAGCACCGCATATGCCGAGGATTCCCCTGGTCTATCGCATCGGGGCCACCA 100  
 GW *nagQ* 1 ATGATCAAAAAGCCATTTCCCTCGCAGGACTTGGGATGCTGATGCTCAGCACCGCATATGCCGAGGATTCCCCTGGTCTATCGCATCGGGGCCACCA 100  
  
 U2 *nagQ* 101 ACGTAGCCTTCGATGCGAGCGCCAAAGTTCGATTGACGGAAACAGGTGTGCCGGGTGGAGCGCTGACGCCAGTGACACAACGCTTTGACATTTGACTT 200  
 CJ2 *nagQ* 101 ACGTAGCCTTCGATGCGAGCGCCAAAGTTCGATTGACGGAAACAGGTGTGCCGGGTGGAGCGCTGACGCCAGTGACACAACGCTTTGACATTTGACTT 200  
 GW *nagQ* 101 ACGTAGCCTTCGATGCGAGCGCCAAAGTTCGATTGACGGAAACAGGTGTGCCGGGTGGAGCGCTGACGCCAGTGACACAACGCTTTGACATTTGACTT 200  
  
 U2 *nagQ* 201 CGGTACATCATTAACGATAACTGGAACGCGCGATTAAATGTTGGCATTCCAACCACAAAAGTGACGGGGCGAGGACGCTGCCCTCCGATTTTGGCTG 300  
 CJ2 *nagQ* 201 CGGTACATCATTAACGATAACTGGAACGCGCGATTAAATGTTGGCATTCCAACCACAAAAGTGACGGGGCGAGGACGCTGCCCTCCGATTTTGGCTG 300  
 GW *nagQ* 201 CGGTACATCATTAACGATAACTGGAACGCGCGATTAAATGTTGGCATTCCAACCACAAAAGTGACGGGGCGAGGACGCTGCCCTCCGATTTTGGCTG 300  
  
 U2 *nagQ* 301 GGCCGTGTC CAATAAGCTCCCTGCA GTTTTGTGCGGCGACCTACAACCTGCCACAGATGGGATTGGTTGCGCCCTACGTGGGGGCGGGGATCAACTACACTC 400  
 CJ2 *nagQ* 301 GGCCGTGTC CAATAAGCTCCCTGCA GTTTTGTGCGGCGACCTACAACCTGCCACAGATGGGATTGGTTGCGCCCTACGTGGGGGCGGGGATCAACTACACTC 400  
 GW *nagQ* 301 GGCCGTGTC CAATAAGCTCCCTGCA GTTTTGTGCGGCGACCTACAACCTGCCACAGATGGGATTGGTTGCGCCCTACGTGGGGGCGGGGATCAACTACACTC 400  
  
 U2 *nagQ* 401 GAATTTGAAAAGCGAAGATGCCAATCTGACCTCATTTCGATGCAGATCATGCGTGGGCACCTGTGCTCCACATCGGTCGAGAAGCGAACATCAACCGCGA 500  
 CJ2 *nagQ* 401 GAATTTGAAAAGCGAAGATGCCAATCTGACCTCATTTCGATGCAGATCATGCGTGGGCACCTGTGCTCCACATCGGTCGAGAAGCGAACATCAACCGCGA 500  
 GW *nagQ* 401 GAATTTGAAAAGCGAAGATGCCAATCTGACCTCATTTCGATGCAGATCATGCGTGGGCACCTGTGCTCCACATCGGTCGAGAAGCGAACATCAACCGCGA 500  
  
 U2 *nagQ* 501 CTGGTTGTCAGCTTTGATATCCGAAAACTTTATCTAAAAACAGATGCATCGGGTTTCTTGGGCCCAAGTTCGACAGCCCGGTAACATTGAATCCG 600  
 CJ2 *nagQ* 501 CTGGTTGTCAGCTTTGATATCCGAAAACTTTATCTAAAAACAGATGCATCGGGTTTCTTGGGCCCAAGTTCGACAGCCCGGTAACATTGAATCCG 600  
 GW *nagQ* 501 CTGGTTGTCAGCTTTGATATCCGAAAACTTTATCTAAAAACAGATGCATCGGGTTTCTTGGGCCCAAGTTCGACAGCCCGGTAACATTGAATCCG 600  
  
 U2 *nagQ* 601 CTGCTGACCTCGATTGCGATTGGCCGGAGATTCTGA 636  
 CJ2 *nagQ* 601 CTGCTGACCTCGATTGCGATTGGCCGGAGATTCTGA 636  
 GW *nagQ* 601 CTGCTGACCTCGATTGCGATTGGCCGGAGATTCTGA 636

|     |             |      |                                                                                                       |      |
|-----|-------------|------|-------------------------------------------------------------------------------------------------------|------|
| U2  | <i>nagE</i> | 1    | ATGACAAGAAAGACGAGCAAAGCGGTGCGCCTGACCGCGGGGATATTCAAGGCGCATGGGTCAITCATGCCGACCCCGTCCACGCCGGATGCCTCGGACT  | 100  |
| CJ2 | <i>nagE</i> | 1    | ATGACAAGAAAGACGAGCAAAGCGACGCGCCTGACTGCAGAGGATATTCAAGGCGCATGGGTCAITCATGCCGACCCCGTCCACGCCGGATGCCTCGGACT | 100  |
| GW  | <i>nagE</i> | 1    | ATGACAAGAAAGACGAGCAAAGCGACGCGCCTGACTGCAGAGGATATTCAAGGCGCATGGGTCAITCATGCCGACCCCGTCCACGCCGGATGCCTCGGACT | 100  |
| U2  | <i>nagE</i> | 101  | GGCGCAGCACGCACACGGTGGATCTCGACGAGACGGCCCGGATGTCTGAGGAGTTGATAGCGGCCGGGTCAATGGCATTCTGAGCCACGGCACCTTTTGG  | 200  |
| CJ2 | <i>nagE</i> | 101  | GGCGCAGCACGCACACGGTGGATCTCGACGAGACGGCCCGGATGTCTGAGGAGTTGATAGCGGCCGGGTCAATGGCATTCTGAGCCACGGCACCTTTTGG  | 200  |
| GW  | <i>nagE</i> | 101  | GGCGCAGCACGCACACGGTGGATCTCGACGAGACGGCCCGGATGTCTGAGGAGTTGATAGCGGCCGGGTCAATGGCATTCTGAGCCACGGCACCTTTTGG  | 200  |
| U2  | <i>nagE</i> | 201  | CGAATGCGCGACGCTGACGTGGGAGGAGAAGCGGGATTTTTGTTTTCAACGGTTCGTGGAAACCGCGCGGTTCGAGTGCCTACTTCTGCGGCACAACGGCC | 300  |
| CJ2 | <i>nagE</i> | 201  | TGAATGCGCGACGCTGACGTGGGAGGAGAAGCGGGATTTTTGTTTTCAACGGTTCGTGGAAACCGCGCGGTTCGAGTGCCTACTTCTGCGGCACAACAGCC | 300  |
| GW  | <i>nagE</i> | 201  | TGAATGCGCGACGCTGACGTGGGAGGAGAAGCGGGATTTTTGTTTTCAACGGTTCGTGGAAACCGCGCGGTTCGAGTGCCTACTTCTGCGGCACAACAGCC | 300  |
| U2  | <i>nagE</i> | 301  | TTGAATACCCGTGAAGTCATACGCCAGACCCGCGAATGTATCGACATTGGCGCCCAAGGAACATGCTCGGCGTGCCGATGTGGGTGAAGATGGATCTGC   | 400  |
| CJ2 | <i>nagE</i> | 301  | TTGAATACCCGTGAAGTCATACGCCAGACCCGCGAATGTATCGACATTGGCGCCCAAGGAACATGCTCGGCGTGCCGATGTGGGTGAAGATGGATCTGC   | 400  |
| GW  | <i>nagE</i> | 301  | TTGAATACCCGTGAAGTCATACGCCAGACCCGCGAATGTATCGACATTGGCGCCCAAGGAACATGCTCGGCGTGCCGATGTGGGTGAAGATGGATCTGC   | 400  |
| U2  | <i>nagE</i> | 401  | CTACTGCCGTGCAATTTTTATCGCGATGTGGCGGAAGCGGTGCCAGATGCGGCCATCGCTGTCTACGCCAACCCGGAGGCTTTCAAATTTGATTTTCCTCG | 500  |
| CJ2 | <i>nagE</i> | 401  | CTACTGCCGTGCAATTTTTATCGCGATGTGGCGGAAGCGGTGCCAGATGCGGCCATCGCTGTCTACGCCAACCCGGAGGCTTTCAAATTTGATTTTCCTCG | 500  |
| GW  | <i>nagE</i> | 401  | CTACTGCCGTGCAATTTTTATCGCGATGTGGCGGAAGCGGTGCCAGATGCGGCCATCGCTGTCTACGCCAACCCGGAGGCTTTCAAATTTGATTTTCCTCG | 500  |
| U2  | <i>nagE</i> | 501  | CCCGTTTTGGGCCGAAATGTCCAAAATCCCGCAAGTTGTACAGCCAAGTACTTGGGCATCGGATGCTGGACTTGGATCTGAAATGGCCCAAATATT      | 600  |
| CJ2 | <i>nagE</i> | 501  | CCCGTTTTGGGCCGAAATGTCCAAAATCCCGCAAGTTGTACAGCCAAGTACTTGGGCATCGGATGCTGGACTTGGATCTGAAATGGCCCAAATATT      | 600  |
| GW  | <i>nagE</i> | 501  | CCCGTTTTGGGCCGAAATGTCCAAAATCCCGCAAGTTGTACAGCCAAGTACTTGGGCATCGGATGCTGGACTTGGATCTGAAATGGCCCAAATATT      | 600  |
| U2  | <i>nagE</i> | 601  | CGCTTCCTTCCGCATGAGGATGACTACTACGCTGCGGCCCGGATCAATCCGAGCGCATGACTGCTTTCTGGTCTAGCGGTTCATGTGCGGCCAGCGA     | 700  |
| CJ2 | <i>nagE</i> | 601  | CGCTTCCTTCCGCATGAGGATGACTACTACGCTGCGGCCCGGATCAATCCGAGCGCATGACTGCTTTCTGGTCTAGCGGTTCATGTGCGGCCAGCGA     | 700  |
| GW  | <i>nagE</i> | 601  | CGCTTCCTTCCGCATGAGGATGACTACTACGCTGCGGCCCGGATCAATCCGAGCGCATGACTGCTTTCTGGTCTAGCGGTTCATGTGCGGCCAGCGA     | 700  |
| U2  | <i>nagE</i> | 701  | CGGCCCTTGTGCTCCGGATGAGGTGGTAAAGGCCAAATAACAGGTGATTTGGCCCAAGGCCAAGGCATTTTCAGATGACATGCGCGCAGCCGATGCCAC   | 800  |
| CJ2 | <i>nagE</i> | 701  | CGGCCCTTGTGCTCCGGATGAGGTGGTAAAGGCCAAATAACAGGTGATTTGGCCCAAGGCCAAGGCATTTTCAGATGACATGCGCGCAGCCGATGCCAC   | 800  |
| GW  | <i>nagE</i> | 701  | CGGCCCTTGTGCTCCGGATGAGGTGGTAAAGGCCAAATAACAGGTGATTTGGCCCAAGGCCAAGGCATTTTCAGATGACATGCGCGCAGCCGATGCCAC   | 800  |
| U2  | <i>nagE</i> | 801  | ACTGTTTTCCACGCGGCATTTCTCGGAATTCTCAAATAACAACATTGGCTCGAAAAAGCACGAATGGACGAGGCAGGCTGGCTCAAAGCGGGGGCCGTGC  | 900  |
| CJ2 | <i>nagE</i> | 801  | ACTGTTTTCCACGCGGCATTTCTCGGAATTCTCAAATAACAACATTGGCTCGAAAAAGCACGAATGGACGAGGCAGGCTGGCTCAAAGCGGGGGCCGTGC  | 900  |
| GW  | <i>nagE</i> | 801  | ACTGTTTTCCACGCGGCATTTCTCGGAATTCTCAAATAACAACATTGGCTCGAAAAAGCACGAATGGACGAGGCAGGCTGGCTCAAAGCGGGGGCCGTGC  | 900  |
| U2  | <i>nagE</i> | 901  | CGGCCACCCTATACGCTGGTCCCGAGGAATACCTTGCAGGTGCCGAAAATCAGGCAAGGCCTGGGCCGCACTGCATACCAAGTATGCCAAGGAATTGA    | 1000 |
| CJ2 | <i>nagE</i> | 901  | CGGCCACCCTATACGCTGGTCCCGAGGAATACCTTGCAGGTGCCGAAAATCAGGCAAGGCCTGGGCCGCACTGCATACCAAGTATGCCAAGGAATTGA    | 1000 |
| GW  | <i>nagE</i> | 901  | CGGCCACCCTATACGCTGGTCCCGAGGAATACCTTGCAGGTGCCGAAAATCAGGCAAGGCCTGGGCCGCACTGCATACCAAGTATGCCAAGGAATTGA    | 1000 |
| U2  | <i>nagE</i> | 1001 | GGAAAACCAAACCGGCAACCAACTCGAAAAAGAAGTAA                                                                | 1038 |
| CJ2 | <i>nagE</i> | 1001 | GGAAAACCAAACCGGCAACCAACTCGAAAAAGAAGTAA                                                                | 1038 |
| GW  | <i>nagE</i> | 1001 | GGAAAACCAAACCGGCAACCAACTCGAAAAAGAAGTAA                                                                | 1038 |

— GYVI30E01EB2RY  
 - - - GYVI30E01EQ8UF

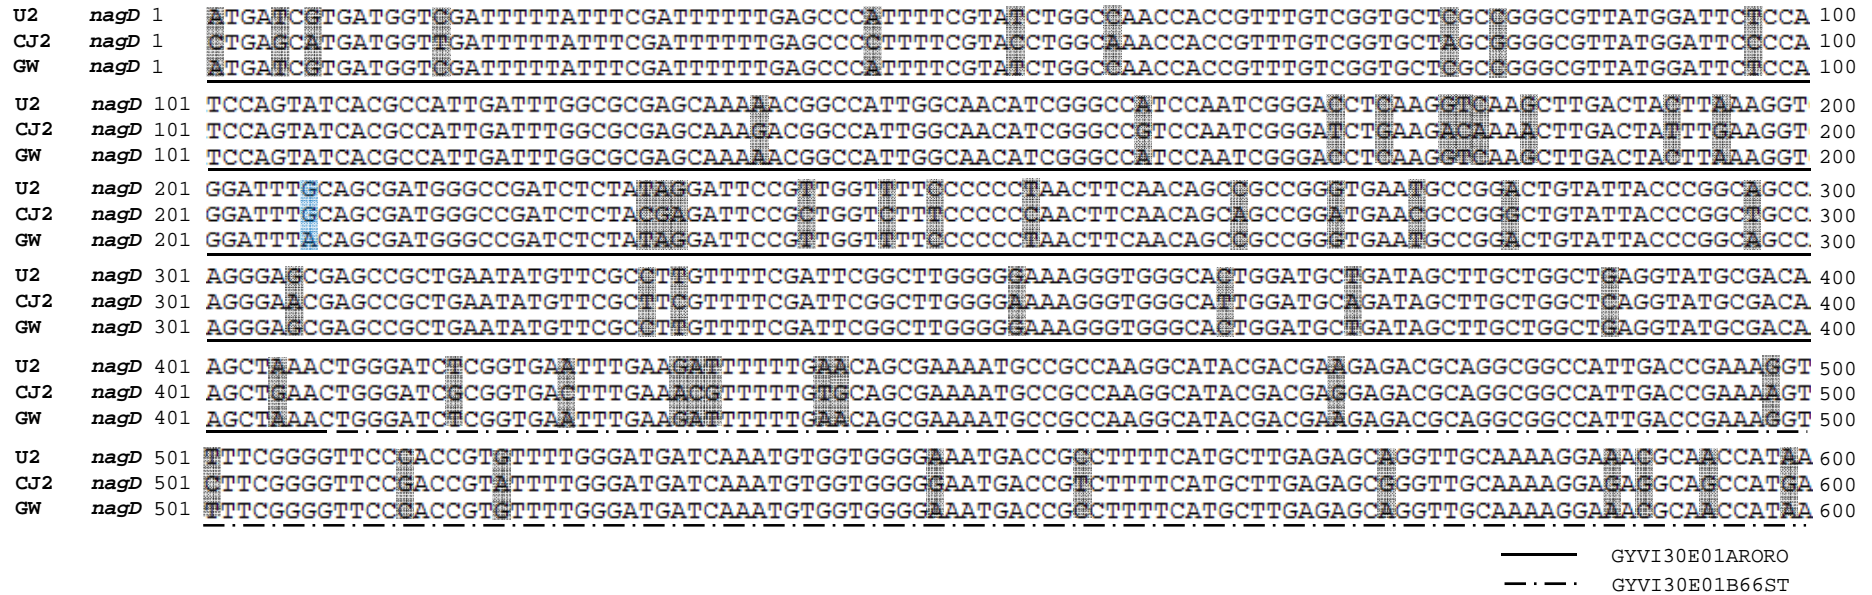

**Figure S6. Multi-sequence alignment of the *nag* operons, including *nag2*, *nag-U2* and *nag-CJ2*.**

Bases which were not the same between *nag2*, *nag-U2* and *nag-CJ2* are colored.

Grey highlight represents homologous bases between *nag2* and *nag-U2*, but different from *nag-CJ2*;

Red highlight represents homologous bases between *nag2* and *nag-CJ2*, but different from *nag-U2*;

Blue highlight represents bases of *nag2* with no homologies with either *nag-CJ2* or *nag-U2*.

The DNA sequence of *nagFCQED* is from the plasmid pWH\_NagFCQED. Bases from single 454 sequencing read are underlined and marked alongside each gene. The numbers on the bottom right are the codes of individual 454 sequence reads.
