# Supplementary material for: A Culture-Independent Approach to Unravel Uncultured Bacteria and Functional Genes in a Complex Microbial Community
Source: PLOS journal article supplement (doi:10.1371/journal.pone.0047530), 2012-10-17
Supplement: S3 (10.1371/journal.pone.0047530.s003) [file journal.pone.0047530.s003]

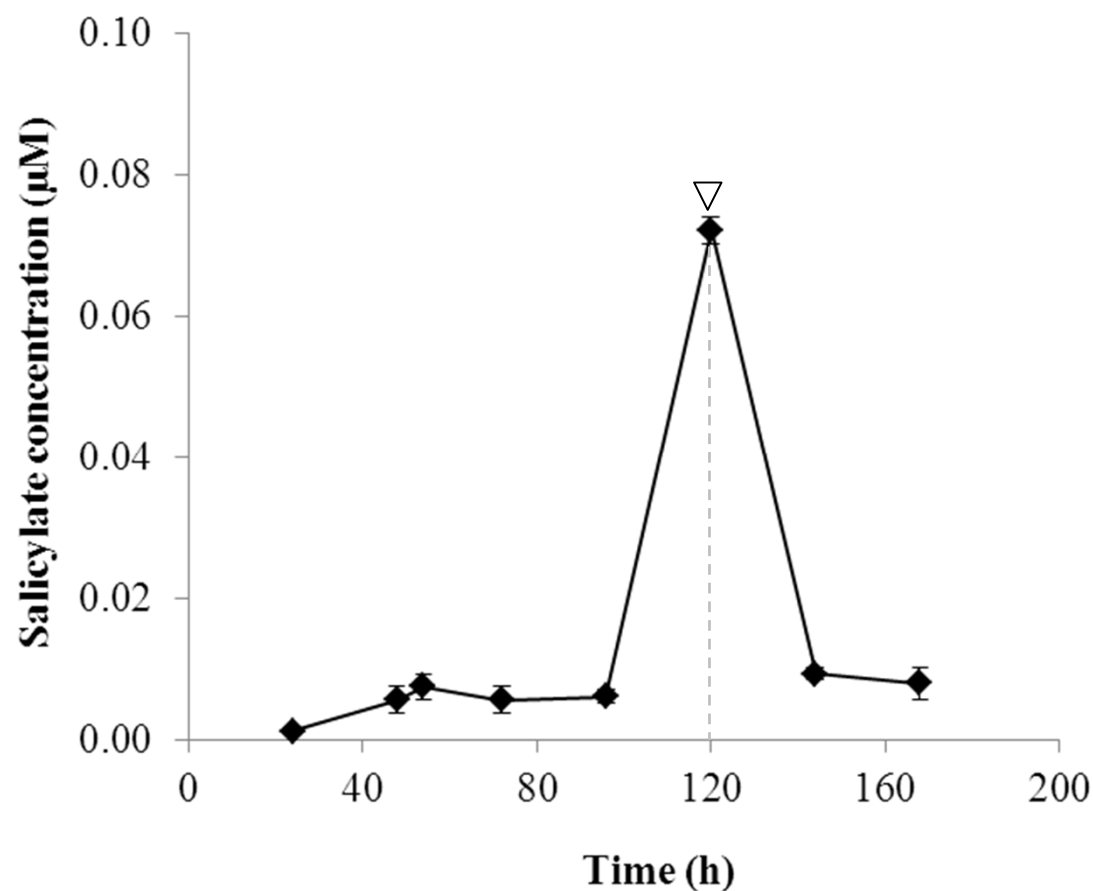

**Figure S3. Salicylate (an intermediate metabolite) accumulation in groundwater indicating naphthalene (3.8 μM) degradation.** Salicylate detection was performed using the salicylate biosensor ADPWH\_lux which showed bioluminescence in the presence of salicylate. Naphthalene catabolism releasing salicylate was evident after 120 h incubation. Results are the mean +/- SD of 4 replicate measurements.
