# Supplementary material for: A Culture-Independent Approach to Unravel Uncultured Bacteria and Functional Genes in a Complex Microbial Community
Source: PLoS One. 2012 Oct 17;7(10):e47530. doi: 10.1371/journal.pone.0047530 (PMC3474725; doi:10.1371/journal.pone.0047530)
Supplement: Table S1 — Homology analysis of nag2 and nag-CJ2/nag-U2. (XLSX) [file pone.0047530.s008.xlsx]

## Sheet: 1-5-Nahg——new
QueryName	QueryLength	Evalue	HitLength	QueryBegin	QueryEnd	Direction	IdentitiesPercent%	HitName	HitBegin
GYVI30E01D06VU|length=506	506nt	1.3e-51	100	100	1	-	1	Nag2U2CJ2	1
GYVI30E01CXOCO|length=493	493nt	8.2e-83	154	340	493	+	1	Nag2U2CJ2	1
GYVI30E01CKEZ9|length=512	512nt	3e-138	250	250	1	-	1	Nag2U2CJ2	1
GYVI30E01D2JFH|length=502	502nt	3e-164	295	295	1	-	1	Nag2U2CJ2	1
GYVI30E01AKXQY|length=505	505nt	3e-164	295	295	1	-	1	Nag2U2CJ2	1
GYVI30E01CM1JZ|length=480	480nt	1e-85	159	322	480	+	1	Nag2U2CJ2	1
GYVI30E02HVYJN|length=288	288nt	1e-24	53	231	283	+	1	Nag2U2CJ2	1
GYVI30E02HRSMK|length=503	503nt	7.1e-210	374	374	1	-	1	Nag2U2CJ2	1
GYVI30E02I1K1H|length=504	504nt	5.1e-103	189	316	504	+	1	Nag2U2CJ2	1
GYVI30E02I4SSN|length=475	475nt	2.8e-138	250	250	1	-	1	Nag2U2CJ2	1
GYVI30E02GCUIL|length=506	506nt	1.6e-136	253	254	506	+	0.9961	Nag2U2CJ2	1
GYVI30E01EFUU9|length=475	475nt	5.8e-69	136	340	475	+	0.9927	Nag2U2CJ2	1
GYVI30E02IW9PV|length=375	375nt	4.1e-207	375	375	1	-	0.9973	Nag2U2CJ2	15
GYVI30E01CMX3C|length=419	419nt	3e-223	419	419	1	-	0.9905	Nag2U2CJ2	15
GYVI30E02JLMZ7|length=373	373nt	5.8e-206	373	373	1	-	0.9946	Nag2U2CJ2	385
GYVI30E02JI2G9|length=432	432nt	4.8e-233	432	432	1	-	0.9908	Nag2U2CJ2	393
GYVI30E01D91NR|length=503	503nt	3.1e-283	501	501	1	-	1	Nag2U2CJ2	520
GYVI30E02FY9K2|length=494	494nt	3.7e-275	494	494	1	-	0.998	Nag2U2CJ2	528
GYVI30E01EXTIQ|length=420	420nt	1.6e-236	420	420	1	-	1	Nag2U2CJ2	537
GYVI30E01EVVFJ|length=487	487nt	1.2e-226	430	1	430	+	0.9907	Nag2U2CJ2	605
GYVI30E01BAVCX|length=496	496nt	6.9e-277	496	1	496	+	0.998	Nag2U2CJ2	661
GYVI30E02IQKLW|length=467	467nt	1.3e-263	467	467	1	-	1	Nag2U2CJ2	707
GYVI30E02GKJ5F|length=243	243nt	1.5e-134	243	243	1	-	1	Nag2U2CJ2	714
GYVI30E02JQVM7|length=440	440nt	4.4e-237	440	1	440	+	0.9932	Nag2U2CJ2	775
GYVI30E01AR1WF|length=448	448nt	3.1e-238	448	1	448	+	0.9911	Nag2U2CJ2	775
GYVI30E02IUX4F|length=480	480nt	4e-271	480	480	1	-	1	Nag2U2CJ2	776
GYVI30E01EDRSA|length=253	253nt	2.3e-133	253	1	253	+	0.9922	Nag2U2CJ2	827
GYVI30E01DR7CS|length=517	517nt	3.8e-290	516	516	1	-	0.9981	Nag2U2CJ2	870
GYVI30E02JAAYI|length=499	499nt	2.4e-280	499	499	1	-	0.998	Nag2U2CJ2	887
GYVI30E01ATRNN|length=403	403nt	2.3e-220	399	1	399	+	0.9975	Nag2U2CJ2	930
GYVI30E01C1KON|length=460	460nt	8.2e-254	460	460	1	-	0.9935	Nag2U2CJ2	1016
GYVI30E01BVUAO|length=345	345nt	1.5e-191	345	1	345	+	0.9971	Nag2U2CJ2	1062
GYVI30E01DYBXL|length=492	492nt	2.9e-272	492	492	1	-	0.9959	Nag2U2CJ2	1065
GYVI30E02JXCDQ|length=434	434nt	1.1e-159	297	1	297	+	0.9933	Nag2U2CJ2	1130
GYVI30E01ALPVF|length=409	409nt	2.3e-220	409	1	409	+	0.9927	Nag2U2CJ2	1146
GYVI30E01DTG90|length=482	482nt	1.5e-270	482	1	482	+	0.9979	Nag2U2CJ2	1204
GYVI30E01DTX4D|length=280	280nt	8.4e-152	280	280	1	-	0.9964	Nag2U2CJ2	1414
GYVI30E01A0Z9G|length=385	385nt	2.4e-216	385	1	385	+	1	Nag2U2CJ2	1426
GYVI30E01B3SLS|length=508	508nt	8.3e-284	508	1	508	+	0.998	Nag2U2CJ2	1469
GYVI30E01C03HC|length=471	471nt	6.2e-266	471	1	471	+	1	Nag2U2CJ2	1483
GYVI30E01DP676|length=471	471nt	6.2e-266	471	1	471	+	1	Nag2U2CJ2	1483
GYVI30E01ELUUQ|length=471	471nt	6.2e-266	471	1	471	+	1	Nag2U2CJ2	1483
GYVI30E01ARVBZ|length=471	471nt	6.8e-262	470	1	470	+	0.9979	Nag2U2CJ2	1483
GYVI30E01DC1PA|length=503	503nt	7.3e-262	470	1	470	+	0.9979	Nag2U2CJ2	1483
GYVI30E02IKHAP|length=470	470nt	6.8e-262	470	1	470	+	0.9979	Nag2U2CJ2	1483
GYVI30E01AEJYA|length=465	465nt	2e-258	465	1	465	+	0.9978	Nag2U2CJ2	1483
GYVI30E01AVT2Q|length=381	381nt	1.4e-210	381	1	381	+	0.9974	Nag2U2CJ2	1483
GYVI30E01B4E8J|length=465	465nt	2.9e-216	391	1	391	+	0.9974	Nag2U2CJ2	1483
GYVI30E02HV7D6|length=484	484nt	5.8e-270	484	1	484	+	0.9959	Nag2U2CJ2	1483
GYVI30E01CK7E8|length=447	447nt	1.2e-237	439	439	1	-	0.9909	Nag2U2CJ2	1488
GYVI30E01EUMBH|length=266	266nt	6.8e-145	261	261	1	-	1	Nag2U2CJ2	1491
GYVI30E01DFT7M|length=487	487nt	3.7e-275	487	1	487	+	1	Nag2U2CJ2	1503
GYVI30E02FO22E|length=509	509nt	7.5e-288	509	1	509	+	1	Nag2U2CJ2	1505
GYVI30E02GBHNZ|length=496	496nt	1.6e-270	489	1	489	+	0.9959	Nag2U2CJ2	1508
GYVI30E01DKIBN|length=369	369nt	5.4e-195	369	1	369	+	0.9919	Nag2U2CJ2	1508
GYVI30E01COZMH|length=338	338nt	6.6e-183	336	1	336	+	0.9911	Nag2U2CJ2	1508
GYVI30E02IPAZY|length=500	500nt	1.2e-282	500	1	500	+	1	Nag2U2CJ2	1523
GYVI30E02G43CE|length=326	326nt	4.2e-173	319	8	326	+	0.9938	Nag2U2CJ2	1524
GYVI30E01BV9K5|length=498	498nt	6.3e-281	497	2	498	+	1	Nag2U2CJ2	1589
GYVI30E01AJRC1|length=403	403nt	1e-226	403	403	1	-	1	Nag2U2CJ2	1603
GYVI30E02HBAOW|length=186	186nt	9.8e-102	186	186	1	-	1	Nag2U2CJ2	1603
GYVI30E01D2RIE|length=494	494nt	3.4e-279	494	494	1	-	1	Nag2U2CJ2	1721
GYVI30E02GOIF6|length=418	418nt	2.3e-235	418	1	418	+	1	Nag2U2CJ2	1732
GYVI30E01CEUWJ|length=437	437nt	6.2e-236	437	437	1	-	0.9932	Nag2U2CJ2	1762
GYVI30E01CY13W|length=472	472nt	1.6e-266	472	472	1	-	1	Nag2U2CJ2	1852
GYVI30E01AG0H5|length=478	478nt	1.2e-267	474	474	1	-	1	Nag2U2CJ2	1874
GYVI30E01BFIIJ|length=131	131nt	3.9e-70	131	131	1	-	1	Nag2U2CJ2	1911
GYVI30E01DEP3M|length=131	131nt	3.9e-70	131	131	1	-	1	Nag2U2CJ2	1911
GYVI30E01DS593|length=131	131nt	3.9e-70	131	131	1	-	1	Nag2U2CJ2	1911
GYVI30E01C0Z0V|length=131	131nt	3.9e-70	131	131	1	-	1	Nag2U2CJ2	1911
GYVI30E01D3E8P|length=131	131nt	3.9e-70	131	131	1	-	1	Nag2U2CJ2	1911
GYVI30E01CMA19|length=355	355nt	7.3e-168	322	1	322	+	0.9907	Nag2U2CJ2	1916
GYVI30E02GGTNF|length=432	432nt	1e-241	432	1	432	+	0.9977	Nag2U2CJ2	1930
GYVI30E02G4RIU|length=390	390nt	1.9e-213	390	390	1	-	0.9949	Nag2U2CJ2	1959
GYVI30E02HCLC8|length=358	358nt	9.6e-197	358	358	1	-	0.9972	Nag2U2CJ2	1991
GYVI30E01ALH9O|length=161	161nt	2.3e-87	161	1	161	+	1	Nag2U2CJ2	2003
GYVI30E01CD7IX|length=400	400nt	5.4e-225	400	1	400	+	1	Nag2U2CJ2	2003
GYVI30E02IHWFG|length=131	131nt	4.4e-66	131	1	131	+	0.9924	Nag2U2CJ2	2003
GYVI30E02F0MQM|length=350	350nt	1.9e-194	350	1	350	+	0.9971	Nag2U2CJ2	2116
GYVI30E01AZ0XV|length=470	470nt	3.7e-260	470	1	470	+	0.9936	Nag2U2CJ2	2129
GYVI30E02HSN34|length=184	184nt	4e-97	184	184	1	-	0.9946	Nag2U2CJ2	2133
GYVI30E02I0OWP|length=456	456nt	2.4e-250	451	1	451	+	0.9978	Nag2U2CJ2	2154
GYVI30E02GCVSZ|length=449	449nt	7.5e-243	449	449	1	-	0.9911	Nag2U2CJ2	2162
GYVI30E02H8LR3|length=444	444nt	2.8e-242	444	1	444	+	0.9955	Nag2U2CJ2	2179
GYVI30E01EMZIF|length=396	396nt	3.9e-211	396	1	396	+	0.9924	Nag2U2CJ2	2179
GYVI30E02JR1I7|length=332	332nt	2.5e-182	326	7	332	+	1	Nag2U2CJ2	2184
GYVI30E01DLQ3N|length=470	470nt	2.6e-220	412	412	1	-	0.9927	Nag2U2CJ2	2202
GYVI30E02HESUK|length=416	416nt	9.4e-231	416	416	1	-	0.9952	Nag2U2CJ2	2227
GYVI30E01CYTYJ|length=411	411nt	5.8e-210	395	395	1	-	0.9924	Nag2U2CJ2	2251
GYVI30E02FME6Y|length=476	476nt	1.1e-256	476	476	1	-	0.9937	Nag2U2CJ2	2265
GYVI30E02ICJE9|length=218	218nt	5.3e-67	126	213	88	-	1	Nag2U2CJ2	2304
GYVI30E02JNZND|length=445	445nt	6.7e-247	445	445	1	-	0.9978	Nag2U2CJ2	2377
GYVI30E01AH4CX|length=341	341nt	1.8e-183	341	1	341	+	0.9942	Nag2U2CJ2	2403
GYVI30E02HG20I|length=453	453nt	1.4e-244	453	453	1	-	0.9912	Nag2U2CJ2	2446
GYVI30E02G2BWJ|length=403	403nt	1.4e-225	401	401	1	-	1	Nag2U2CJ2	2498
GYVI30E02GKY5L|length=372	372nt	1.1e-192	364	367	4	-	0.9918	Nag2U2CJ2	2498
GYVI30E01EGHPU|length=93	93nt	5.1e-31	63	93	31	-	1	Nag2U2CJ2	2515
GYVI30E01DE7P3|length=475	475nt	1.6e-255	474	475	2	-	0.9937	Nag2U2CJ2	2515
GYVI30E01BLY07|length=414	414nt	1.1e-222	414	1	414	+	0.9928	Nag2U2CJ2	2528
GYVI30E01CQV2Q|length=484	484nt	6.4e-266	484	484	1	-	0.9959	Nag2U2CJ2	2529
GYVI30E01DLP9L|length=420	420nt	2.4e-220	419	420	2	-	0.9905	Nag2U2CJ2	2569
GYVI30E01B50M9|length=356	356nt	3.1e-189	355	356	2	-	0.9915	Nag2U2CJ2	2633
GYVI30E01CGQNB|length=246	246nt	3.9e-31	64	178	241	+	1	Nag2U2CJ2	2644
GYVI30E01B85Y5|length=480	480nt	4e-271	480	480	1	-	1	Nag2U2CJ2	2864
GYVI30E01AGQML|length=488	488nt	1.9e-262	488	1	488	+	0.9918	Nag2U2CJ2	2892
GYVI30E02JIOJ2|length=511	511nt	4.5e-282	511	511	1	-	0.9961	Nag2U2CJ2	2919
GYVI30E02FQBUC|length=487	487nt	1.2e-200	358	358	1	-	1	Nag2U2CJ2	2928
GYVI30E01ALAUW|length=415	415nt	1e-226	415	415	1	-	0.9952	Nag2U2CJ2	2998
GYVI30E02HIVJZ|length=485	485nt	5.2e-274	485	485	1	-	1	Nag2U2CJ2	3027
GYVI30E01ETBKR|length=274	274nt	2.2e-152	274	274	1	-	1	Nag2U2CJ2	3028
GYVI30E01C29DJ|length=436	436nt	2.8e-242	436	436	1	-	0.9977	Nag2U2CJ2	3031
GYVI30E02GTFGM|length=391	391nt	4.2e-207	387	387	1	-	0.9923	Nag2U2CJ2	3042
GYVI30E02HGH7M|length=466	466nt	5.8e-255	466	1	466	+	0.9957	Nag2U2CJ2	3070
GYVI30E01BQID8|length=511	511nt	1.7e-281	505	1	505	+	0.998	Nag2U2CJ2	3089
GYVI30E01DLDWZ|length=281	281nt	2e-156	281	281	1	-	1	Nag2U2CJ2	3135
GYVI30E01AO5VY|length=407	407nt	8.6e-220	403	403	1	-	0.9951	Nag2U2CJ2	3137
GYVI30E01DIPOD|length=449	449nt	3e-253	449	449	1	-	1	Nag2U2CJ2	3146
GYVI30E02I6XRK|length=322	322nt	4.9e-180	322	322	1	-	1	Nag2U2CJ2	3146
GYVI30E01BH7M6|length=101	101nt	1.8e-23	50	52	101	+	1	Nag2U2CJ2	3153
GYVI30E01AZ8LO|length=426	426nt	6.7e-232	426	426	1	-	0.9953	Nag2U2CJ2	3170
GYVI30E01CDPQW|length=411	411nt	3e-223	411	411	1	-	0.9951	Nag2U2CJ2	3185
GYVI30E02I2NEX|length=41	41nt	9.6e-19	41	41	1	-	1	Nag2U2CJ2	3193
GYVI30E02GIRT6|length=382	382nt	1.3e-214	382	382	1	-	1	Nag2U2CJ2	3212
GYVI30E01DJGS7|length=406	406nt	8.6e-220	404	404	1	-	0.9951	Nag2U2CJ2	3233
GYVI30E02ISZK4|length=380	380nt	2.2e-205	380	380	1	-	0.9947	Nag2U2CJ2	3259
GYVI30E01BM65Y|length=187	187nt	2.9e-98	187	1	187	+	0.9947	Nag2U2CJ2	3266
GYVI30E01BZGQ8|length=516	516nt	9.3e-280	516	516	1	-	0.9942	Nag2U2CJ2	3285
GYVI30E01CRV0Z|length=493	493nt	3.7e-275	493	1	493	+	0.998	Nag2U2CJ2	3330
GYVI30E01CFMDZ|length=491	491nt	5.3e-274	491	1	491	+	0.998	Nag2U2CJ2	3384
GYVI30E01A62JB|length=492	492nt	7.6e-273	492	1	492	+	0.9959	Nag2U2CJ2	3396
GYVI30E02ICJE9|length=218	218nt	8.6e-47	91	1	91	+	1	Nag2U2CJ2	3476
GYVI30E01CMCFP|length=406	406nt	1e-51	100	406	307	-	1	Nag2U2CJ2	3477
GYVI30E01DAJW7|length=414	414nt	3.9e-226	414	414	1	-	0.9952	Nag2U2CJ2	3485
GYVI30E02GNJGU|length=448	448nt	2e-243	448	448	1	-	0.9933	Nag2U2CJ2	3539
GYVI30E01EB2RY|length=352	352nt	2.5e-197	352	352	1	-	1	Nag2U2CJ2	3549
GYVI30E02ISD8Q|length=461	461nt	1.1e-256	461	461	1	-	0.9957	Nag2U2CJ2	3550
GYVI30E01EQ8UF|length=432	432nt	1e-241	432	1	432	+	0.9977	Nag2U2CJ2	3712
GYVI30E01BWREZ|length=159	159nt	3.6e-82	159	1	159	+	0.9937	Nag2U2CJ2	3765
GYVI30E02GV3MB|length=443	443nt	5.2e-244	443	1	443	+	0.9955	Nag2U2CJ2	3792
GYVI30E02GSHZQ|length=192	192nt	3.6e-90	169	192	24	-	0.9941	Nag2U2CJ2	3890
GYVI30E02HIA3G|length=141	141nt	3.8e-74	141	141	1	-	0.9929	Nag2U2CJ2	3927
GYVI30E01C2DOA|length=494	494nt	5.9e-270	493	493	1	-	0.9939	Nag2U2CJ2	3949
GYVI30E02HROYA|length=476	476nt	5.4e-259	476	1	476	+	0.9937	Nag2U2CJ2	3957
GYVI30E02IC1DT|length=213	213nt	3.4e-57	109	1	109	+	1	Nag2U2CJ2	4053
GYVI30E02GIHP2|length=380	380nt	1.1e-207	380	380	1	-	0.9947	Nag2U2CJ2	4065
GYVI30E01APOXQ|length=510	510nt	1.9e-277	510	510	1	-	0.9922	Nag2U2CJ2	4121
GYVI30E01AN2B1|length=493	493nt	1.4e-274	492	2	493	+	0.9959	Nag2U2CJ2	4264
GYVI30E01D94VJ|length=151	151nt	6.9e-80	151	151	1	-	0.9934	Nag2U2CJ2	4270
GYVI30E01ARORO|length=491	491nt	1.5e-270	491	1	491	+	0.9939	Nag2U2CJ2	4290
GYVI30E02GY8R5|length=499	499nt	4.2e-271	499	1	499	+	0.992	Nag2U2CJ2	4290
GYVI30E01B8ATZ|length=233	233nt	5.3e-123	233	233	1	-	0.9914	Nag2U2CJ2	4293
GYVI30E02JDVF7|length=456	456nt	6.9e-247	456	1	456	+	0.9913	Nag2U2CJ2	4307
GYVI30E01BTHTM|length=507	507nt	4.7e-267	500	500	1	-	0.99	Nag2U2CJ2	4312
GYVI30E01DWSTD|length=353	353nt	4e-192	353	1	353	+	0.9943	Nag2U2CJ2	4332
GYVI30E02INTON|length=215	215nt	2e-118	215	215	1	-	1	Nag2U2CJ2	4349
GYVI30E01EKMX9|length=486	486nt	8.3e-269	486	486	1	-	0.9959	Nag2U2CJ2	4363
GYVI30E01DQWAH|length=462	462nt	4.4e-252	462	1	462	+	0.9935	Nag2U2CJ2	4403
GYVI30E02I3OGE|length=143	143nt	1.6e-69	136	143	8	-	0.9927	Nag2U2CJ2	4443
GYVI30E02GG4H3|length=285	285nt	1.6e-153	285	285	1	-	0.993	Nag2U2CJ2	4523
GYVI30E01EBCEL|length=391	391nt	6.3e-191	348	391	44	-	0.9971	Nag2U2CJ2	4629
GYVI30E01E0D6I|length=124	124nt	4.1e-66	124	1	124	+	1	Nag2U2CJ2	4680
GYVI30E01B66ST|length=468	468nt	7.4e-165	296	1	296	+	1	Nag2U2CJ2	4680
GYVI30E01C9B8V|length=453	453nt	7.9e-161	295	1	295	+	0.9966	Nag2U2CJ2	4680
GYVI30E01B28PG|length=495	495nt	6.8e-91	175	1	175	+	0.9943	Nag2U2CJ2	4802
GYVI30E02GBQ8O|length=382	382nt	1.2e-69	138	2	139	+	0.9928	Nag2U2CJ2	4839	164 nag2
GYVI30E01D06VU|length=506	506nt	1.3e-51	100	100	1	-	1	Nag2U2CJ2	4974
GYVI30E01CXOCO|length=493	493nt	8.2e-83	154	340	493	+	1	Nag2U2CJ2	4974
GYVI30E01CKEZ9|length=512	512nt	3e-138	250	250	1	-	1	Nag2U2CJ2	4974
GYVI30E01CM1JZ|length=480	480nt	1e-85	159	322	480	+	1	Nag2U2CJ2	4974
GYVI30E02HVYJN|length=288	288nt	1e-24	53	231	283	+	1	Nag2U2CJ2	4974
GYVI30E02I1K1H|length=504	504nt	5.1e-103	189	316	504	+	1	Nag2U2CJ2	4974
GYVI30E02I4SSN|length=475	475nt	2.8e-138	250	250	1	-	1	Nag2U2CJ2	4974
GYVI30E02GCUIL|length=506	506nt	1.6e-136	253	254	506	+	0.9961	Nag2U2CJ2	4974
GYVI30E01D2JFH|length=502	502nt	8.8e-161	295	295	1	-	0.9932	Nag2U2CJ2	4974
GYVI30E01AKXQY|length=505	505nt	8.9e-161	295	295	1	-	0.9932	Nag2U2CJ2	4974
GYVI30E01EFUU9|length=475	475nt	5.8e-69	136	340	475	+	0.9927	Nag2U2CJ2	4974
GYVI30E01EUMBH|length=266	266nt	1.5e-138	256	256	1	-	0.9922	Nag2U2CJ2	6469
GYVI30E02HBAOW|length=186	186nt	5.3e-100	186	186	1	-	0.9946	Nag2U2CJ2	6576
GYVI30E02GV3MB|length=443	443nt	2.8e-242	443	1	443	+	0.9932	Nag2U2CJ2	8763
GYVI30E02GSHZQ|length=192	192nt	6.7e-92	169	192	24	-	1	Nag2U2CJ2	8861
GYVI30E01EWZYW|length=113	113nt	2.4e-56	113	113	1	-	0.9912	Nag2U2CJ2	8867
GYVI30E02HIA3G|length=141	141nt	7.1e-76	141	141	1	-	1	Nag2U2CJ2	8898
GYVI30E02J57YB|length=311	311nt	1.9e-149	283	311	29	-	0.9929	Nag2U2CJ2	8898
GYVI30E01AZTAN|length=339	339nt	2.1e-175	329	11	339	+	0.9909	Nag2U2CJ2	8913
GYVI30E01C2DOA|length=494	494nt	2.9e-272	494	494	1	-	0.996	Nag2U2CJ2	8919
GYVI30E02HROYA|length=476	476nt	9.9e-261	476	1	476	+	0.9958	Nag2U2CJ2	8928
GYVI30E02IC1DT|length=213	213nt	3.4e-57	109	1	109	+	1	Nag2U2CJ2	9024
GYVI30E02GIHP2|length=380	380nt	2e-209	380	380	1	-	0.9974	Nag2U2CJ2	9036
GYVI30E01APOXQ|length=510	510nt	6.5e-281	510	510	1	-	0.9961	Nag2U2CJ2	9092
GYVI30E02GEMOP|length=472	472nt	9.8e-261	472	1	472	+	0.9937	Nag2U2CJ2	9192
GYVI30E01AN2B1|length=493	493nt	4.8e-278	492	2	493	+	1	Nag2U2CJ2	9235
GYVI30E01D94VJ|length=151	151nt	1.3e-81	151	151	1	-	1	Nag2U2CJ2	9241
GYVI30E01ASCS5|length=400	400nt	4.9e-69	133	1	133	+	0.9925	Nag2U2CJ2	9260
GYVI30E01ARORO|length=491	491nt	5.3e-274	491	1	491	+	0.998	Nag2U2CJ2	9261
GYVI30E02GY8R5|length=499	499nt	1.4e-274	499	1	499	+	0.996	Nag2U2CJ2	9261
GYVI30E01B8ATZ|length=233	233nt	9.8e-125	233	233	1	-	0.9957	Nag2U2CJ2	9264
GYVI30E02JDVF7|length=456	456nt	2.4e-250	456	1	456	+	0.9956	Nag2U2CJ2	9278
GYVI30E01BTHTM|length=507	507nt	1.6e-270	500	500	1	-	0.994	Nag2U2CJ2	9283
GYVI30E01DWSTD|length=353	353nt	7.3e-194	353	1	353	+	0.9972	Nag2U2CJ2	9303
GYVI30E02INTON|length=215	215nt	2e-118	215	215	1	-	1	Nag2U2CJ2	9320
GYVI30E01EKMX9|length=486	486nt	1.5e-270	486	486	1	-	0.9979	Nag2U2CJ2	9334
GYVI30E01CMCFP|length=406	406nt	1.9e-161	310	1	310	+	0.9904	Nag2U2CJ2	9345
GYVI30E01DQWAH|length=462	462nt	8.2e-254	462	1	462	+	0.9957	Nag2U2CJ2	9374
GYVI30E02I3OGE|length=143	143nt	4.3e-70	137	143	7	-	0.9928	Nag2U2CJ2	9414
GYVI30E02GG4H3|length=285	285nt	2.9e-155	285	285	1	-	0.9965	Nag2U2CJ2	9494
GYVI30E01EBCEL|length=391	391nt	6.3e-191	348	391	44	-	0.9971	Nag2U2CJ2	9600
GYVI30E01E0D6I|length=124	124nt	4.1e-66	124	1	124	+	1	Nag2U2CJ2	9651
GYVI30E01B66ST|length=468	468nt	7.4e-165	296	1	296	+	1	Nag2U2CJ2	9651
GYVI30E01C9B8V|length=453	453nt	7.9e-161	295	1	295	+	0.9966	Nag2U2CJ2	9651
GYVI30E01B28PG|length=495	495nt	6.8e-91	175	1	175	+	0.9943	Nag2U2CJ2	9773
GYVI30E02GBQ8O|length=382	382nt	1.2e-69	138	2	139	+	0.9928	Nag2U2CJ2	9810	46nagU2
GYVI30E02JLMZ7|length=373	373nt	1.1e-207	373	373	1	-	0.9973	Nag2U2CJ2	10329
GYVI30E01D91NR|length=503	503nt	3.1e-283	501	501	1	-	1	Nag2U2CJ2	10464
GYVI30E02FY9K2|length=494	494nt	3.7e-275	494	494	1	-	0.998	Nag2U2CJ2	10472
GYVI30E01EXTIQ|length=420	420nt	1.6e-236	420	420	1	-	1	Nag2U2CJ2	10481
GYVI30E01EVVFJ|length=487	487nt	1.2e-226	430	1	430	+	0.9907	Nag2U2CJ2	10549
GYVI30E01BAVCX|length=496	496nt	2e-273	493	1	493	+	0.996	Nag2U2CJ2	10605
GYVI30E02IQKLW|length=467	467nt	1.1e-256	467	467	1	-	0.9914	Nag2U2CJ2	10651
GYVI30E02GKJ5F|length=243	243nt	1.5e-134	243	243	1	-	1	Nag2U2CJ2	10658
GYVI30E01EDRSA|length=253	253nt	2.3e-133	253	1	253	+	0.9922	Nag2U2CJ2	10771
GYVI30E01BKF7S|length=491	491nt	8.4e-269	491	491	1	-	0.9939	Nag2U2CJ2	11240
GYVI30E02ICJE9|length=218	218nt	5.3e-67	126	213	88	-	1	Nag2U2CJ2	12248
GYVI30E02JNZND|length=445	445nt	2e-243	445	445	1	-	0.9933	Nag2U2CJ2	12321
GYVI30E02G2BWJ|length=403	403nt	4.2e-222	401	401	1	-	0.995	Nag2U2CJ2	12442
GYVI30E01EGHPU|length=93	93nt	5.1e-31	63	93	31	-	1	Nag2U2CJ2	12459
GYVI30E01CQV2Q|length=484	484nt	1.9e-262	484	484	1	-	0.9918	Nag2U2CJ2	12473
GYVI30E01B85Y5|length=480	480nt	4e-271	480	480	1	-	1	Nag2U2CJ2	12808
GYVI30E01AGQML|length=488	488nt	1.9e-262	488	1	488	+	0.9918	Nag2U2CJ2	12836
GYVI30E02JIOJ2|length=511	511nt	4.5e-282	511	511	1	-	0.9961	Nag2U2CJ2	12863
GYVI30E02FQBUC|length=487	487nt	1.2e-200	358	358	1	-	1	Nag2U2CJ2	12872
GYVI30E01ALAUW|length=415	415nt	1e-226	415	415	1	-	0.9952	Nag2U2CJ2	12942
GYVI30E02HIVJZ|length=485	485nt	5.2e-274	485	485	1	-	1	Nag2U2CJ2	12971
GYVI30E01ETBKR|length=274	274nt	2.2e-152	274	274	1	-	1	Nag2U2CJ2	12972
GYVI30E01C29DJ|length=436	436nt	2.8e-242	436	436	1	-	0.9977	Nag2U2CJ2	12975
GYVI30E02GTFGM|length=391	391nt	4.2e-207	387	387	1	-	0.9923	Nag2U2CJ2	12986
GYVI30E02HGH7M|length=466	466nt	5.8e-255	466	1	466	+	0.9957	Nag2U2CJ2	13014
GYVI30E01BQID8|length=511	511nt	1.7e-281	505	1	505	+	0.998	Nag2U2CJ2	13033
GYVI30E01DLDWZ|length=281	281nt	2e-156	281	281	1	-	1	Nag2U2CJ2	13079
GYVI30E01AO5VY|length=407	407nt	8.6e-220	403	403	1	-	0.9951	Nag2U2CJ2	13081
GYVI30E01DIPOD|length=449	449nt	3e-253	449	449	1	-	1	Nag2U2CJ2	13090
GYVI30E02I6XRK|length=322	322nt	4.9e-180	322	322	1	-	1	Nag2U2CJ2	13090
GYVI30E01BH7M6|length=101	101nt	1.8e-23	50	52	101	+	1	Nag2U2CJ2	13097
GYVI30E01AZ8LO|length=426	426nt	6.7e-232	426	426	1	-	0.9953	Nag2U2CJ2	13114
GYVI30E01CDPQW|length=411	411nt	3e-223	411	411	1	-	0.9951	Nag2U2CJ2	13129
GYVI30E02I2NEX|length=41	41nt	9.6e-19	41	41	1	-	1	Nag2U2CJ2	13137
GYVI30E02GIRT6|length=382	382nt	1.3e-214	382	382	1	-	1	Nag2U2CJ2	13156
GYVI30E01DJGS7|length=406	406nt	8.6e-220	404	404	1	-	0.9951	Nag2U2CJ2	13177
GYVI30E02ISZK4|length=380	380nt	2.2e-205	380	380	1	-	0.9947	Nag2U2CJ2	13203
GYVI30E01BM65Y|length=187	187nt	2.9e-98	187	1	187	+	0.9947	Nag2U2CJ2	13210
GYVI30E01BZGQ8|length=516	516nt	9.3e-280	516	516	1	-	0.9942	Nag2U2CJ2	13229
GYVI30E01CRV0Z|length=493	493nt	1.1e-271	493	1	493	+	0.9939	Nag2U2CJ2	13274
GYVI30E02ICJE9|length=218	218nt	8.6e-47	91	1	91	+	1	Nag2U2CJ2	13420
GYVI30E01CMCFP|length=406	406nt	1e-51	100	406	307	-	1	Nag2U2CJ2	13421
GYVI30E02GLH9S|length=371	371nt	5.4e-195	364	364	1	-	0.9918	Nag2U2CJ2	13969
GYVI30E01BE8QG|length=358	358nt	5.2e-195	358	358	1	-	0.9944	Nag2U2CJ2	14050
GYVI30E01B7FXQ|length=512	512nt	2.9e-220	392	1	392	+	1	Nag2U2CJ2	14527	45 nagCJ2
Note:				Nag type	Percentage (100%)
1-4973 nag2				nag2	64.3137
4974-9944 nagU2				nag-CJ2	18.0392
9945-14918 nagCJ2				nag-U2	17.6471
